1 Alternative polyadenylation drives oncogenic gene expression in pancreatic  
2 ductal adenocarcinoma

3  
4  
5  
6  
7  
8  
9

10 Swati Venkat<sup>1</sup>, Arwen A. Tisdale<sup>1</sup>, Johann R. Schwarz<sup>1</sup>, Abdulrahman A. Alahmari<sup>1</sup>, H. Carlo  
11 Maurer<sup>2</sup>, Kenneth P. Olive<sup>2</sup>, Kevin H. Eng<sup>3,4</sup> and Michael E. Feigin<sup>1,\*</sup>

12  
13  
14  
15  
16  
17

18 <sup>1</sup>Department of Pharmacology and Therapeutics, Roswell Park Comprehensive Cancer Center, Buffalo,  
19 NY

20 <sup>2</sup>Herbert Irving Comprehensive Cancer Center, Department of Medicine, Division of Digestive and Liver  
21 Diseases, Department of Pathology and Cell Biology, Columbia University Medical Center, New York, NY

22 <sup>3</sup>Department of Biostatistics and Bioinformatics, Roswell Park Comprehensive Cancer Center, Buffalo,  
23 NY

24 <sup>4</sup>Department of Cancer Genetics and Genomics, Roswell Park Comprehensive Cancer Center, Buffalo,  
25 NY

26  
27  
28

29 \*Correspondence may be addressed to: MEF ([michael.feigin@roswellpark.org](mailto:michael.feigin@roswellpark.org)), Twitter:  
30 @TheFeiginLab

31 **ABSTRACT**

32 Alternative polyadenylation (APA) is a gene regulatory process that dictates mRNA 3'-UTR  
33 length, resulting in changes in mRNA stability and localization. APA is frequently disrupted in  
34 cancer and promotes tumorigenesis through altered expression of oncogenes and tumor  
35 suppressors. Pan-cancer analyses have revealed common APA events across the tumor  
36 landscape; however, little is known about tumor type-specific alterations that may uncover novel  
37 events and vulnerabilities. Here we integrate RNA-sequencing data from the Genotype-Tissue  
38 Expression (GTEx) project and The Cancer Genome Atlas (TCGA) to comprehensively analyze  
39 APA events in 148 pancreatic ductal adenocarcinomas (PDAs). We report widespread,  
40 recurrent and functionally relevant 3'-UTR alterations associated with gene expression changes  
41 of known and newly identified PDA growth-promoting genes and experimentally validate the  
42 effects of these APA events on expression. We find enrichment for APA events in genes  
43 associated with known PDA pathways, loss of tumor-suppressive miRNA binding sites, and  
44 increased heterogeneity in 3'-UTR forms of metabolic genes. Survival analyses reveal a subset  
45 of 3'-UTR alterations that independently characterize a poor prognostic cohort among PDA  
46 patients. Finally, we identify and validate the casein kinase CK1 $\alpha$  as an APA-regulated  
47 therapeutic target in PDA. Knockdown or pharmacological inhibition of CK1 $\alpha$  attenuates PDA  
48 cell proliferation and clonogenic growth. Our single-cancer analysis reveals APA as an  
49 underappreciated driver of pro-tumorigenic gene expression in PDA via the loss of miRNA  
50 regulation.

51

52

53

54

55

56

57

58

59

60

61

62

63

## 64 INTRODUCTION

65 Pancreatic ductal adenocarcinoma (PDA) is a lethal cancer with a 5-year survival rate of 9%<sup>1</sup>.  
66 Extensive sequencing studies have uncovered recurrently mutated genes (*KRAS*, *TP53*,  
67 *SMAD4*, *CDKN2A*) and dysregulated pathways (axon guidance, cell adhesion, small GTPase  
68 signaling, protein metabolism) driving disease initiation and progression<sup>2-4</sup>. Gene expression  
69 profiles from hundreds of patient samples have allowed the identification of several PDA  
70 subtypes, with implications for treatment response and patient outcome<sup>5-10</sup>. Gene expression  
71 can be dysregulated in cancer through a variety of mechanisms, including genomic  
72 amplification/deletion, epigenetic modification and noncoding mutations in  
73 promoters/enhancers<sup>11-15</sup>. For example, recurrent noncoding mutations in PDA are enriched in  
74 promoters of cancer-associated genes and pathways<sup>16</sup>. However, our understanding of the  
75 mechanisms driving dysregulated gene expression in cancer remains incomplete. Determining  
76 the regulatory mechanisms driving dysregulated gene expression is critical to understanding  
77 disease pathogenesis. One such regulatory mechanism that has recently gained recognition as  
78 a critical driver of gene expression is alternative polyadenylation (APA).

79  
80 APA is a post-transcriptional process that generates distinct mRNA isoforms of the same gene  
81 as a mechanism to modulate gene expression. This includes transcripts that have identical  
82 coding sequences but vary only in their 3'-UTR length<sup>17-19</sup>. Changes in 3'-UTR length can  
83 modulate mRNA stability, function or subcellular localization through disruption of miRNA or  
84 RNA-binding protein regulation<sup>18,20,21</sup>. APA is driven by a large complex of polyadenylation  
85 factors that recognize a series of highly conserved sequences within the 3'-UTR on the newly  
86 synthesized pre-mRNA before cleavage and addition of the poly(A) tail<sup>18,22,23</sup>. As most  
87 transcripts contain multiple polyadenylation sites (PAS), the choice of where to cleave is a  
88 critical determinant of 3'-UTR length. In humans, a majority of genes (51-79%) express  
89 alternative 3'-UTRs, demonstrating the widespread nature of this process<sup>24</sup>. Indeed, APA has  
90 important roles in muscle stem cell function, cell proliferation, chromatin signaling, pluripotent  
91 cell fate, cellular senescence and other physiological processes<sup>25-29</sup>. Recently, dysregulation of  
92 APA has gained recognition as a driver of tumorigenesis<sup>28,30-33</sup>. APA factor expression is altered  
93 in a variety of cancer types and promotes tumorigenesis by regulating the expression of  
94 oncogenes (via loss of miRNA regulation) and tumor suppressors (via disruption of competing-  
95 endogenous RNA crosstalk)<sup>32-36</sup>. The relevance of APA in cancer was established with the  
96 discovery of a systemic increase in the usage of a proximal PAS leading to consistently  
97 shortened 3'-UTRs of oncogenes such as Insulin-like growth factor 2 mRNA-binding protein 1

98 (*IMP1*), Ras-Related C3 Botulinum Toxin Substrate 1 (*RAC1*) and *Cyclin D2*<sup>30,33</sup>. Functional  
99 studies of the genes comprising the APA machinery have highlighted their relevance to tumor  
100 growth; for example, in glioblastoma, overexpression of the APA factor *NUDT21* (a repressor of  
101 proximal 3'-UTR PAS usage) reduces tumor cell proliferation and inhibits tumor growth *in vivo*<sup>32</sup>.  
102 Subsequently, a number of pan-cancer analyses have utilized standard RNA-sequencing (RNA-  
103 seq) data to identify 3'-UTR shortening and lengthening events across cancer types<sup>37-41</sup>. While  
104 these analyses have uncovered recurrent APA events across multiple tumor types, they also  
105 detected tumor type-specific events<sup>42</sup>. Additionally, differential 3'-UTR processing has been  
106 shown to drive tissue-specific gene expression<sup>43</sup>. However, there has been no in-depth single  
107 cancer analysis with a sufficiently large patient cohort to unravel disease-specific APA  
108 alterations. Furthermore, none of the pan-cancer studies have included PDA due to a lack of  
109 matched normal controls and therefore, the landscape of APA in PDA remains completely  
110 uncharacterized.

111  
112 To determine the relevance of APA in PDA, we performed a comprehensive analysis of the  
113 changes in PAS usage using RNA-seq data from 148 PDA tumors from The Cancer Genome  
114 Atlas TCGA-PAAD (Pancreatic Adenocarcinoma) study and 184 normal pancreata from the  
115 Genotype-Tissue Expression (GTEx) project<sup>44,45</sup>. We performed a systems level analysis to  
116 identify trends in APA, impacts on gene expression, and effects of miRNA regulation. We  
117 discovered widespread 3'-UTR shortening events in PDA, including a subset of 68 genes  
118 shortened in >90% of patients. These 3'-UTR shortened genes did not overlap with commonly  
119 mutated PDA genes, but were enriched in PDA pathways. Furthermore, we found preferential  
120 loss of known tumor suppressive miRNA binding sites within the shortened 3'-UTRs, suggesting  
121 that APA may be acted upon by selection during tumor progression. Importantly, we identify a  
122 subset of 20 genes that detect a poor outcome cohort in PDA patients, highlighting the  
123 prognostic power of APA. Experimental validation revealed APA as a novel mechanism of  
124 regulation for known PDA growth-promoting genes. Furthermore, using computational,  
125 pharmacological and genetic approaches, we identified the casein kinase CK1 $\alpha$  as a new  
126 therapeutic target in PDA. Our in-depth analysis reveals APA as a recurrent, widespread  
127 mechanism underlying oncogenic gene expression changes through loss of tumor suppressive  
128 miRNA regulation in pancreatic cancer.

129

## 130 RESULTS

131 To analyze differences in APA profiles between tumor and normal samples, we selected 148  
132 patients out of the total 178 PDA patients with aligned RNA-seq data from the TCGA-PAAD  
133 study. We excluded 30 patients in the cohort that did not have histologically observable PDA  
134 tumors<sup>4</sup>. Due to the paucity of RNA-seq data from matched normal tissues within the TCGA-  
135 PAAD study, we procured raw RNA-seq reads from 184 normal pancreata from the GTEx  
136 project. The library preparation and sequencing platform were identical for the TCGA-PAAD  
137 study and GTEx pancreata data<sup>45,4</sup>, thereby minimizing potential batch effects. Several previous  
138 studies have successfully compared TCGA and GTEx gene expression data, noting minimal  
139 batch effects when processed in an identical manner<sup>46-48</sup>. Therefore, these datasets were  
140 processed identically and analyzed for differences in APA in our downstream analyses (Supp.  
141 Fig. 1). To allow a rigorous comparison between GTEx normal pancreas and TCGA-PAAD  
142 tumor samples, we aligned raw reads from the GTEx RNA-seq data as per the TCGA pipeline.  
143 We processed the tumor and normal aligned files to generate coverage files that were used as  
144 an input for the DaPars (Dynamic Analysis of Alternative Polyadenylation from RNA-Seq)  
145 algorithm<sup>41</sup>. DaPars is a regression-based algorithm that performs de-novo identification of APA  
146 events between two conditions using standard RNA-seq data<sup>32,33,41</sup>. DaPars generates a mean  
147 PDUI score (Percentage Distal Usage Index) for each gene, quantifying the extent of usage of  
148 the distal PAS across each group. Genes favoring distal PAS usage (long 3'-UTRs) have PDUI  
149 scores near 1, while genes favoring proximal PAS usage (short 3'-UTRs) have PDUI scores  
150 near 0. A change in the mean PDUI score between tumor and normal samples for each gene  
151 ( $\Delta$ PDUI) is then calculated and used to indicate tumor-associated 3'-UTR shortening ( $\Delta$ PDUI <  
152 0) or lengthening ( $\Delta$ PDUI > 0) events.

153

### 154 **Integrative analysis of GTEx and TCGA-PAAD RNA-seq data identifies 3'-UTR shortening** 155 **events associated with PDA.**

156 To determine the extent of APA-mediated 3'-UTR shortening and lengthening in PDA, we  
157 compared the PDUI scores for each gene between the tumor and normal samples (Fig. 1A,B).  
158 While the majority of genes do not undergo changes in APA, PDA patients are characterized by  
159 a greater number of significant 3'-UTR shortening events (red dots, n=271) as compared to  
160 significant lengthening events (blue dots, n=191) (Fig. 1B). A higher number of 3'-UTR  
161 shortening events compared to lengthening events in PDA is consistent with patterns observed  
162 in multiple pan-cancer analyses<sup>30,41,49</sup>. The tumor-associated shortening and lengthening events  
163 were predominantly 100-300bp and 200-300bp in length, respectively (Fig. 1C). Amongst the

164 genes found to have significantly shortened 3'-UTR lengths were many known PDA growth-  
165 promoting genes, including *PAF1* (Polymerase Associated Factor 1), *FLNA* (Filamin-A), *ENO1*  
166 ( $\alpha$  Enolase), *RALGDS* (Ral guanine nucleotide dissociation stimulator), *TRIP10* (Thyroid  
167 Hormone Receptor Interactor 10) and *ALDOA* (Aldolase A). *ALDOA* and *PAF1* have recently  
168 been described as oncogenes in PDA<sup>50-53</sup>, while *ENO1*, *RALGDS*, *TRIP10* and *FLNA* are  
169 known to mediate pancreatic cancer cell proliferation, survival and migration<sup>54-59</sup>. We did not  
170 detect 3'-UTR alterations in recurrently mutated PDA genes, reflecting the predominant role of  
171 APA in regulating gene expression rather than gene function. We visualized the 3'-UTR profiles  
172 of these genes between TCGA and GTEx samples to confirm 3'-UTR shortening (see *FLNA*,  
173 *PAF1* as examples, Fig. 1D).

174  
175 PDA samples are often characterized by substantial stromal contamination<sup>5</sup>; therefore, we  
176 sought to determine if significant APA events were present in the stroma or the tumor  
177 epithelium. First, we analyzed PDUI changes in a subset of 69 high purity TCGA-PAAD tumor  
178 samples<sup>4</sup> (>33% tumor content). 89% of gene hits from our original analysis showed up as  
179 significant hits in the high purity dataset, suggesting that the majority of the detected APA  
180 changes were not attributable to stromal contamination (Supp. Fig. 2A,B). We further addressed  
181 this concern by visualizing the 3'-UTR profile of our candidate genes in an independent dataset  
182 containing RNA-seq information from 65 matched human PDA samples with micro-dissected  
183 tumor epithelia and stroma<sup>5,60</sup>. As an example, Fig. 1E shows the differential 3'-UTR shortening  
184 of *FLNA* and *PAF1* in patient tumor epithelium (tumor cells) as compared to the matched  
185 stroma.

186  
187 We validated the presence of alternative 3'-UTR forms for several APA-regulated candidate  
188 genes by 3'-RACE (rapid amplification of 3' ends) in 2 human pancreatic cancer cell lines (Suit2,  
189 MiaPaCa2) and 3 primary patient samples (Fig. 1F,G). These genes included the previously  
190 described PDA growth-promoting genes, as well as the spermine/spermidine acetyltransferase  
191 *SAT1*, and PP2A subunit B isoform  $\delta$  (*PPP2R2D*). *SAT1* modulates cell migration and  
192 resistance in multiple tumor types, while *PPP2R2D* is a component of the tumor suppressive  
193 phosphatase PP2A<sup>61-66</sup>. With the exception of *PPP2R2D*, which displayed significant 3'-UTR  
194 lengthening and downregulation in tumors, all of the validated genes were significantly  
195 shortened and overexpressed in the TCGA-PAAD dataset. We detected 3'-UTR short and long  
196 forms via 3'-RACE. The short 3'-UTR form for each shortened gene predominated over the long  
197 form (Fig. 1F,G). *ENO1* showed a single 3'-UTR form suggesting that this is the predominant

198 form in cancer cells. In contrast, *PPP2R2D* showed an increased proportion of the 3'-UTR long  
199 form in PDA cell lines and patient samples as compared to the short form, suggesting greater  
200 use of the distal PAS for this putative tumor suppressive gene. For every candidate, we  
201 successfully identified PAS sites within its 3'-UTR sequence that matched the expected position  
202 of proximal and distal PAS in the detected 3'-RACE forms (Supp. Fig. 2C). Therefore, a large-  
203 scale comparison of 3'-UTR alterations can identify tumor epithelium-specific changes from the  
204 TCGA and GTEx datasets, and these 3'-UTR forms can be detected in cell models and patient  
205 samples.

206

### 207 **3'-UTR changes are widespread among PDA patients and enriched in PDA pathways.**

208 To visualize the landscape of APA across PDA, we clustered patients (columns) based on  
209 change in PDUI score (tumor - normal mean;  $\Delta$ PDUI) for 3'-UTR altered genes (rows) (Fig. 2A).  
210 This analysis uncovered a subset of genes (n=68) that showed 3'-UTR shortening (red) in >90%  
211 of patients, highlighting the widespread nature of APA across PDA. A smaller subset of 3'-UTRs  
212 (n=26, bottom heatmap) was recurrently lengthened (blue) in the tumor cohort. Hierarchical  
213 clustering identified multiple patient subgroups characterized by 3'-UTR alterations of specific  
214 gene sets (Subgroups 1-5). Notably, Subgroup 5 was enriched in shortened 3'-UTRs and  
215 contained relatively few lengthening events. In contrast, Subgroup 1 displayed fewer 3'-UTR  
216 shortening events and was enriched in 3'-UTR lengthening. Subgroups 2-4 were characterized  
217 by shortening events in specific subsets of genes. APA-based clustering therefore revealed  
218 distinct patient subgroups. These subgroups did not correlate with the mutational status of  
219 recurrently mutated PDA genes (*KRAS*, *CDKN2A*, *SMAD4*, *TP53*), nor did they associate with  
220 previously described PDA subtypes.

221

222 Pathway analysis of the significantly altered genes revealed enrichment for mRNA 3' end  
223 processing and splicing, as well as smooth muscle contraction and platelet activation. Similar  
224 pathways have been found by pan-cancer APA analyses, concordant with the presence of  
225 recurrent APA events across multiple cancer types<sup>41,43</sup>. However, we observed further  
226 enrichments in PDA-associated pathways, including protein metabolism, signaling by receptor  
227 tyrosine kinases, signaling by RHO GTPases, JAK-STAT signaling and cell-extracellular matrix  
228 interactions (Fig. 2B). Therefore, APA alterations may regulate the activity of PDA-promoting  
229 pathways.

230

### 231 **3'-UTR shortening identifies a poor prognostic cohort in PDA patients.**

232 Next, we asked whether APA events added additional prognostic information to PDA patient  
233 outcomes above the usual demographic and clinical factors: age, race, sex, stage, grade and  
234 surgical outcome. We selected genes with significant 3'-UTR alterations and univariate  
235 prognostic value, defining prognostic classes based on multivariate clustering (Fig. 3A). This  
236 segregated patients into three cohorts based on their 3'-UTR patterns (long=blue; short=red).  
237 Cohort A was predominantly associated with proximal PAS usage of genes from Groups 2 and  
238 3, while cohort C was associated with distal PAS usage of the same genes. For Group 1 genes,  
239 distal PAS usage was predominant in cohort A while proximal PAS usage was predominant in  
240 cohort C. Neither patient cohort correlated with any of the known PDA tumor subtypes.  
241 Importantly, cohorts A and C displayed significant differences in overall survival, with patients in  
242 cohort C living significantly longer than those in cohort A ( $p=0.02$ ) (Fig. 3B). Therefore, patterns  
243 of APA can be used as an independent prognostic indicator in PDA.

244

#### 245 **Heterogeneity of proximal PAS usage of metabolic genes in PDA patients.**

246 Processes generating genetic and epigenetic heterogeneity can drive tumor evolution<sup>67-69</sup>. We  
247 hypothesized that APA could represent such a process, creating a diverse set of 3'-UTR forms  
248 and allowing cancer cells to select for those that promote their survival and propagation. To  
249 examine this heterogeneity, we compared the extent of proximal PAS usage across patients in  
250 any given gene between tumor and normal samples. *ALDOA* is shown as an example gene that  
251 exhibited a tight distribution of proximal PAS usage across normal as well as patient tumors  
252 (Fig. 4A). The left shift of the tumor sample mean score represents the expected shortening of  
253 the *ALDOA* 3'-UTR. However, for *FLNA*, while the normal samples had a tight distribution, PDA  
254 patients showed greater heterogeneity in proximal PAS usage (Fig. 4B). An analysis of  
255 heterogeneity in proximal PAS usage for all genes revealed that while the majority of genes did  
256 not show a significant change between normal and tumor conditions, 68 genes showed greater  
257 heterogeneity in tumor (orange) samples and only 9 genes showed greater heterogeneity in  
258 normal (purple) samples (Fig. 4C). This heterogeneity was not due to intrinsic differences  
259 between the TCGA and GTEx datasets because none of the 215 housekeeping genes in the  
260 dataset showed heterogeneity in the extent of proximal PAS usage<sup>70,71</sup>. The subset of 68 genes  
261 was enriched in metabolic genes, specifically amino acid transporters and purine metabolism. A  
262 wide range of heterogeneity of proximal PAS usage in PDA patients suggests a possible role of  
263 PAS usage plasticity in promoting cancer cell survival and progression.

264

#### 265 **APA drives altered protein expression in PDA.**



266 To determine whether the identified APA events drive altered gene expression in PDA, we  
267 computed differential gene expression between normal (GTEx) and tumor (TCGA-PAAD)  
268 tissues. This allowed association studies between specific APA events and changes in gene  
269 expression. Among 3'-UTR shortened genes, 76 were significantly upregulated, while 50 genes  
270 were significantly downregulated in tumors (Fig. 5A,B). The pattern of 3'-UTR shortening  
271 preferentially associated with increased gene expression is consistent with pan-cancer APA  
272 analyses and conforms to the expectation that 3'-UTR shortened genes can escape miRNA  
273 regulation leading to increased gene expression<sup>30,72,73</sup>. In contrast, 3'-UTR lengthened genes  
274 showed a similar number of significantly upregulated (n=42) and significantly downregulated  
275 (n=41) genes, consistent with pan-cancer analyses, and most likely reflective of positive and  
276 negative regulation by RNA-binding proteins<sup>29,74,75</sup>.

277  
278 To experimentally validate the relationship between APA and protein expression, we performed  
279 luciferase reporter assays in MiaPaCa2 cells, comparing protein expression driven by short and  
280 long 3'-UTRs (Fig. 5C). We focused on the candidate oncogenes and tumor suppressors  
281 validated by 3'-RACE and that showed significant association between 3'-UTR changes and  
282 gene expression in tumors. These candidates included *ALDOA*, *FLNA*, *PAF1*, *TRIP10*, *ENO1*,  
283 *SAT1* (shortened and upregulated in tumors) and *PPP2R2D* (lengthened and downregulated in  
284 tumors). We also included *RALGDS* which is shortened but does not show altered expression in  
285 tumors. We cloned the short and long 3'-UTRs of each gene (estimated via 3'-RACE)  
286 downstream of a *Renilla* luciferase reporter and measured luminescence as a readout of protein  
287 expression (Fig. 5C). To ensure that the long 3'-UTR form for each reporter gene remained  
288 intact (*i.e.*, did not undergo APA-mediated shortening upon transfection into cells), we mutated  
289 their functional proximal PAS. For all genes tested except *ENO1* and *RALGDS*, the short 3'-  
290 UTR form showed significantly increased luminescence compared to the long 3'-UTR form (Fig.  
291 5D). As predicted, the 3'-UTR short and long forms of *RALGDS* showed similar expression. In  
292 contrast to our expectations, the short form of *ENO1* showed decreased protein expression  
293 suggesting that 3'-UTR shortening is not the sole mechanism regulating protein abundance of  
294 *ENO1* in PDA. These results also reinforce the observation that shorter 3'-UTRs do not always  
295 increase protein expression<sup>30</sup>. Overall, the above results suggest that APA-mediated 3'-UTR  
296 alterations can regulate the protein expression of growth-promoting genes in PDA cells.

297  
298 We next sought to determine the mechanism underlying the 3'-UTR-mediated gene regulation  
299 of the PDA oncogene *ALDOA*. Given that miRNAs primarily destabilize their target mRNA and

300 that *ALDOA* undergoes 3'-UTR shortening and upregulation, we searched the *ALDOA* 3'-UTR  
301 for putative miRNA binding sites that would be lost upon PDA-associated shortening (Fig. 5E).  
302 We identified the tumor suppressive miRNA miR-122a within this lost region; miR-122a is highly  
303 expressed in PDA cell lines<sup>76,77</sup>. Mutation of the miR-122a site within the long 3'-UTR of *ALDOA*  
304 significantly restored protein expression (Fig. 5F). Therefore, altered APA can regulate  
305 oncogene expression in PDA through modulation of available regulatory miRNA binding sites.

306

307 **APA-mediated loss of tumor suppressive miRNA binding sites is associated with poor**  
308 **patient outcome.**

309 To assess global patterns of APA-mediated miRNA binding site loss we searched for highly  
310 conserved miRNA binding sites (conserved across human, mouse, rat, dog and chicken) within  
311 the lost 3'-UTRs of all shortened genes. This analysis revealed that 42% of genes lost at least  
312 one highly conserved miRNA binding site (Fig. 6A), suggesting that alteration of the miRNA  
313 binding site repertoire is an important mode of APA-mediated regulation. Next, we sought to  
314 determine if any miRNA families were preferentially lost in shortened 3'-UTRs of PDA patients.  
315 We computed an index for repression for each miRNA family as a function of the miRNA site  
316 context scores (obtained from TargetScan) and the abundance of the 3'-UTR form containing  
317 that site. This index was then compared between PDA patients and normal controls to yield a Z-  
318 score. A lower Z-score for a miRNA family reflects preferential loss of its binding sites due to 3'-  
319 UTR shortening. Interestingly, 6 of the top 8 identified miRNAs have been implicated as tumor  
320 suppressors in PDA, including miR-329 and miR-133a<sup>78-82</sup> (Fig. 6B). These results suggest that  
321 APA regulates oncogenic gene expression through preferential loss of tumor suppressive  
322 miRNA binding sites and may therefore confer a selective advantage to the cell.

323

324 Next, we determined whether loss of specific miRNA sites associated with 3'-UTR alterations is  
325 associated with patient outcome. We quantified loss of highly conserved miRNA binding sites  
326 for each patient as a function of the extent of proximal PAS usage in all genes that lost those  
327 miRNA sites (see Methods). Clustering in the miRNA feature space revealed 3 patient groups  
328 (Fig. 6C) with significant differences in overall survival ( $p=0.012$  between Clusters 1 and 3; Fig.  
329 6D). The miRNAs most significantly associated with the patient clusters included miR-133a,  
330 miR-124, miR-421, miR-143 and miR-505. Binding sites for each miRNA were preferentially lost  
331 from Cluster 1 as compared with Cluster 3, suggesting that loss of these regulatory sites  
332 correlates with poor survival of PDA patients (Fig. 6E). Indeed, miR-133a, miR-124 and miR-

333 143 are known tumor suppressors in PDA, again supporting the role of APA in selective loss of  
334 tumor suppressive miRNA binding sites<sup>80,83–89</sup>.

335

336 **The APA-regulated gene *CSNK1A1* is required for proliferation and clonogenic growth of**  
337 **PDA cells.**

338 Our data showed APA-mediated regulatory changes in genes known to promote PDA  
339 pathogenesis. We hypothesized that our altered gene list may also contain growth-promoting  
340 genes not previously implicated in PDA biology, and therefore new therapeutic targets. We  
341 focused on the subset of druggable genes that were significantly shortened and upregulated in  
342 PDA. Finally, we overlaid this list with results from a genome-wide CRISPR screen, identifying  
343 genes essential for PDA cell proliferation<sup>90</sup>. This analysis identified *CSNK1A1*, the gene  
344 encoding the serine/threonine kinase casein kinase 1 $\alpha$  (CK1 $\alpha$ ). CK1 $\alpha$  regulates the Wnt/ $\beta$ -  
345 catenin signaling pathway and has dual functions in cell cycle progression and cell division<sup>91–93</sup>.  
346 CK1 $\alpha$  is known to influence tumor progression; however, its role as a tumor suppressor or  
347 oncogene is tumor type-dependent<sup>91,93–95</sup> and CK1 $\alpha$  has no known roles in PDA. *CSNK1A1* has  
348 very low gene expression in normal pancreas but is overexpressed in PDA<sup>96</sup>. We found that  
349 *CSNK1A1* shows significantly higher expression in the PDA epithelium as compared to  
350 precursor lesions (pre-malignant pancreatic intraepithelial neoplasia (PanIN) (Fig. 7A) and  
351 intraductal papillary mucinous neoplasia (IPMN)). We found no significant difference in  
352 *CSNK1A1* expression in the stroma between PDA and precursor lesions. We then determined  
353 whether differential CK1 $\alpha$  activity mediates progression from precursor lesions to PDA. As a first  
354 step, we assembled a context-specific gene regulatory network from 242 micro-dissected  
355 epithelial gene expression profiles using the Algorithm for Reconstruction of Accurate Cellular  
356 Networks (ARACNe)<sup>97,98</sup>. The input list of regulatory proteins for ARACNe contained DNA  
357 binding domain containing proteins as well as signaling proteins (including CK1 $\alpha$ ) and therefore,  
358 was not restricted to transcription factors alone. We then employed MARINA (MAster Regulator  
359 INference algorithm) to determine the activity of CK1 $\alpha$  between precursor lesions and PDA  
360 samples as a function of expression of the CK1 $\alpha$  regulon (inferred using ARACNe)<sup>99</sup>. If the  
361 CK1 $\alpha$  targets are enriched for genes that are differentially expressed between precursor lesions  
362 and PDA, it indicates differential CK1 $\alpha$  activity between the two conditions. Indeed, the positive  
363 targets of CK1 $\alpha$  were more highly expressed in PDA epithelium, whereas the negative targets  
364 showed increased expression in precursor lesions, indicating that CK1 $\alpha$  activity may promote  
365 the progression from precursor lesions to PDA (Fig. 7B). Importantly, CK1 $\alpha$  differential activity

366 was not present in the stroma between PDA and precursor samples suggesting the specific role  
367 of CK1 $\alpha$  in PDA epithelium. As predicted by our computational analysis, 3'-RACE showed that  
368 *CSNK1A1* has an increased proportion of the short 3'-UTR form as compared to the long 3'-  
369 UTR form in PDA cells (Supp. Fig. 3A).

370  
371 We then investigated the potential for CK1 $\alpha$  inhibition to regulate PDA biology with the widely  
372 used small molecule inhibitor D4476<sup>94,96,100</sup>. We treated the PDA cell lines MiaPaCa2 and Suit2  
373 with D4476; while MiaPaCa2 and Suit2 cells were both sensitive to D4476 treatment, Suit2 cells  
374 displayed a 10-fold lower IC<sub>50</sub> (Fig. 7C). Both cell lines also showed dose-dependent  
375 decreases in cell proliferation (Fig. 7D, Supp. Fig. 3B) and clonogenic growth in the presence of  
376 the inhibitor (Fig. 7E,F, Supp. Fig. 3C). To provide genetic evidence for the role of CK1 $\alpha$  in PDA  
377 cell growth, we knocked down *CSNK1A1* in Suit2 and MiaPaCa2 cells with 3 short hairpin RNAs  
378 (shRNA) (Fig. 7G, Supp. Fig. 3D). In concordance with the pharmacological results, *CSNK1A1*  
379 knockdown decreased both cell proliferation and clonogenic growth of PDA cells (Fig. 7H-J,  
380 Supp. Figs. 3E,F), with Suit2 cells showing increased sensitivity to CK1 $\alpha$  loss. The strongest  
381 phenotypic effects were associated with the most efficient knockdown (shRNA 3) in both cell  
382 lines. Therefore, we identify CK1 $\alpha$  as a putative drug target in PDA and reveal the potential of  
383 cancer-specific APA analyses to identify mechanisms of altered gene expression driving cancer  
384 pathogenesis.

## 385 **DISCUSSION**

386 Dysregulated gene expression is a cardinal feature of cancer<sup>101</sup>. However, how gene expression  
387 is altered in cancer and whether the processes driving this dysregulation can be targeted  
388 therapeutically are areas of active investigation. APA has recently been identified as a  
389 candidate driver of gene expression dysregulation. APA factors frequently show aberrant  
390 expression in cancer, modulate the expression of known oncogenes and tumor suppressors,  
391 and knockdown studies have highlighted their relevance to the cancer phenotype<sup>31–34,102,103</sup>.  
392 Whole-genome CRISPR and shRNA screens have also revealed the requirement for several  
393 APA factors in pancreatic cancer cell growth ([www.depmap.org](http://www.depmap.org)). Global analyses have revealed  
394 widespread 3'-UTR changes across multiple cancer types, uncovering recurrent alterations  
395 common across the cancer spectrum<sup>38–41</sup>. Recent findings suggest that while some APA events  
396 are widely shared across cancers, many are tumor type-specific<sup>42</sup>. Despite this observation,  
397 there have been few attempts to study APA in a single tumor type with sufficient power to  
398 identify tumor-specific alterations and vulnerabilities.

399  
400 To our knowledge, this study represents the first global, in-depth, single cancer view of APA,  
401 and the first examination of APA in PDA clinical samples. The only previous study of APA in  
402 PDA showed gemcitabine-induced 3'-UTR shortening of the transcription factor ZEB1 in the  
403 context of drug resistance<sup>104</sup>. Previous APA analyses combined multiple tumor types and used  
404 tumor-adjacent tissue as a “normal” control. However, matched tumor-adjacent normal tissues  
405 are known to represent a state that significantly differs from healthy, normal tissues and may  
406 therefore miss critical APA events<sup>48</sup>. Furthermore, there are insufficient numbers of tumor-  
407 adjacent pancreatic samples within TCGA for a statistically stringent analysis. Therefore, we  
408 attempted to address these issues by using normal pancreas RNA-seq information from the  
409 GTEx project. An important limitation of comparing independently collected datasets is the  
410 inherent disparity between them. We attempted to rectify this by: a) confirming that the two  
411 datasets underwent identical library preparation methods on the same type of sequencing  
412 platform; b) following identical data processing pipelines from the raw sequencing data to  
413 generate the coverage data; c) validating our top hits in an independent micro-dissected  
414 dataset. Consistent with previous publications comparing TCGA and GTEx datasets, we  
415 observed minimal batch effects. As batch effects cannot be completely ruled out, we performed  
416 experimental validation of several candidate APA regulated genes, including *PAF1* and *ALDOA*,  
417 highlighting the robustness of our approach and relevance of our findings to PDA biology.

418 Furthermore, this approach will allow the analysis of APA in other tumor types for which little  
419 tumor-adjacent material is present in TCGA.

420

421 Multiple insights from our analyses are noteworthy. We find that APA events are recurrent and  
422 widespread across PDA patients. For example, 68 genes were shortened and 28 genes were  
423 lengthened in greater than 90% of the patient cohort. This supports the conjecture that APA  
424 dysregulation is a frequent event in PDA. In support of this hypothesis, we find that several APA  
425 factors are highly expressed in PDA, including *CSTF2* (Supp. Fig. 4). *CSTF2* has previously  
426 been implicated as a promoter of lung and bladder cancer, through the regulation of *ERBB2* and  
427 *RAC1* 3'-UTRs, respectively<sup>33,34</sup>. We find frequent 3'-UTR alterations in several notable PDA-  
428 relevant genes whose mechanisms of regulation were previously unknown, including *PAF1*,  
429 *ALDOA* and *FLNA*. Many of the shortened 3'-UTRs correlated with increased gene expression,  
430 providing the first collection of 3'-UTR alterations that correlate with gene expression changes in  
431 PDA. We were able to functionally validate these through luciferase reporter assays,  
432 highlighting the robustness of our analysis. Consistent with pan-cancer APA analyses, we find  
433 enrichment for pathways such as smooth muscle contraction and mRNA 3'-end  
434 processing<sup>29,41,43</sup>. However, we also find enrichment for pathways and processes implicated in  
435 PDA biology, including protein metabolism, receptor tyrosine kinase signaling and signaling by  
436 RHO GTPases. Indeed, the link between 3'-UTR alterations and cancer metabolism has been  
437 identified in previous pan-cancer APA analyses<sup>41</sup>. We also find an unexpected enrichment for  
438 loss of binding sites for tumor-suppressive miRNAs in frequently lost 3'-UTR regions. Therefore,  
439 we propose that APA is an underappreciated mechanism of gene dysregulation in PDA, driving  
440 the expression of growth-promoting genes through disruption of miRNA-mediated regulation.

441

442 The extent of heterogeneity in proximal PAS usage across cancer patients has been largely  
443 overlooked in previous pan-cancer APA analyses. We found little heterogeneity in the extent of  
444 3'-UTR proximal site usage in most genes (including housekeeping genes) in both normal and  
445 PDA samples, again providing evidence for minimal batch effects. However, PDA patients  
446 showed substantial heterogeneity in the extent to which their metabolic genes used the proximal  
447 PAS. This metabolic plasticity in turn could serve as a mechanism to deal with the fluctuating  
448 metabolic demands of cancer cells. These data support the possibility that APA may drive  
449 deregulation of cancer metabolism and tumor evolution by allowing for PAS choice plasticity of  
450 critical metabolic genes in PDA.

451 Several studies have demonstrated the power of APA analysis to improve expression-based  
452 prognostic markers. We report the first subset of 3'-UTR alterations that act as an independent  
453 prognostic indicator of PDA outcome. While several of the genes in this set are known  
454 regulators of tumorigenesis, including *SAT1*, many have not been implicated in PDA biology and  
455 may represent new mediators of cancer phenotypes. Interestingly, lost miRNA sites are  
456 enriched for tumor-suppressive miRNA families. In particular, we observed that patients who  
457 retain binding sites for a subset of 5 miRNAs survive longer than patients who lose them. This  
458 uncovers the prognostic role for a novel subset of miRNA mediators in PDA.

459  
460 Our in-depth analysis of APA in PDA revealed a critical role for the druggable target CK1 $\alpha$  in  
461 PDA cell growth and survival. While CK1 $\alpha$  has known roles in Wnt signaling and p53 activation,  
462 important mediators of PDA progression, the relevance of CK1 $\alpha$  to PDA was previously  
463 unknown<sup>93-96</sup>. Furthermore, the mechanisms of regulation of CK1 $\alpha$  in cancer are not well  
464 understood, although promoter methylation in melanoma has been reported<sup>105</sup>. Interestingly,  
465 two CK1 $\alpha$  isoforms have been detected in HeLa cells, with the shorter isoform being generated  
466 from the use of an alternative PAS<sup>106</sup>. We show that CK1 $\alpha$  exhibits increased activity in PDA  
467 samples as compared to precursors, and that pharmacological and genetic blockade of CK1 $\alpha$   
468 attenuates PDA cell proliferation and clonogenic growth. Therefore, our single-cancer approach  
469 can identify APA-regulated, disease-specific vulnerabilities.

470  
471 Our computational analysis and experimental validation have revealed unexpected mediators of  
472 PDA biology and broadened our understanding of the regulatory role of 3'-UTR sequence space  
473 in cancer. This comprehensive analysis reveals the scope of previously uncharacterized APA  
474 events in regulating functionally relevant PDA genes, improving patient prognosis and driving  
475 tumor evolution. We propose that the landscape of 3'-UTR alterations in PDA represents a  
476 novel avenue to better understand PDA progression and identify new drug targets.

477  
478  
479  
480  
481  
482  
483

484 **DATA AVAILABILITY STATEMENT**

485 All RNA-seq files were downloaded via NCBI dbGAP. This included 184 normal pancreas SRA  
486 files from GTEx (dbGAP accession phs000424.v8.p2) and 148 BAM files within the TCGA-  
487 PAAD cohort (<https://portal.gdc.cancer.gov/>).



488 **ACKNOWLEDGEMENTS**

489 This work was supported by NCI grants P30 CA016056 and R25 CA181003, an award from the  
490 Roswell Park Alliance Foundation to MEF, and DoD grant OC170368 to KHE. We thank the  
491 Roswell Park Gene Modulation core, Pathology Shared Resource, Genomics Shared Resource  
492 and the Small Molecule Screening Shared Resource for their assistance. We thank the  
493 members of the Feigin Lab, the Roswell Park Department of Pharmacology and Therapeutics,  
494 and the Science Twitter community for their helpful comments on the manuscript.

495 **AUTHOR CONTRIBUTIONS**

496 Wrote the manuscript: SV, MEF

497 Supervised the study: MEF

498 Performed DaPars analysis: SV

499 Performed biological experiments: SV, AAT, JRS, AAA

500 Contributed to data analysis: SV, KHE, HCM, KPO

501 Developed prognostic signatures: KHE

502 **COMPETING FINANCIAL INTERESTS**

503 The authors declare no competing financial interests.

504 **REFERENCES**

- 505 1. Noone AM, Howlader N, Krapcho M, Miller D, Brest A, Yu M, Ruhl J, Tatalovich Z,  
506 Mariotto A, Lewis DR, Chen HS, Feuer EJ, C. K. Survival Rates for Pancreatic Cancer.  
507 *American Cancer Society. Cancer Facts & Figures 2019. Atlanta, GA: American Cancer*  
508 *Society; 2019*
- 509 2. Jones, S. *et al.* Core signaling pathways in human pancreatic cancers revealed by global  
510 genomic analyses. *Science* **321**, 1801–6 (2008).
- 511 3. Waddell, N. *et al.* Whole genomes redefine the mutational landscape of pancreatic  
512 cancer. *Nature* **518**, 495–501 (2015).
- 513 4. The Cancer Genome Atlas. Integrated Genomic Characterization of Pancreatic Ductal  
514 Adenocarcinoma. *Cancer Cell* **32**, 185–203 (2017).
- 515 5. Maurer, C. *et al.* Experimental microdissection enables functional harmonisation of  
516 pancreatic cancer subtypes. *Gut* **68**, 1034–1043 (2019).
- 517 6. Lomberk, G. *et al.* Distinct epigenetic landscapes underlie the pathobiology of pancreatic  
518 cancer subtypes. *Nat. Commun.* **9**, 1978 (2018).
- 519 7. Tiriác, H. *et al.* Organoid Profiling Identifies Common Responders to Chemotherapy in  
520 Pancreatic Cancer. *Cancer Discov.* **8**, 1112–1129 (2018).
- 521 8. Bailey, P. *et al.* Genomic analyses identify molecular subtypes of pancreatic cancer.  
522 *Nature* **531**, 47–52 (2016).
- 523 9. Moffitt, R. A. *et al.* Virtual microdissection identifies distinct tumor- and stroma-specific  
524 subtypes of pancreatic ductal adenocarcinoma. *Nat. Genet.* **47**, 1168–1178 (2015).
- 525 10. Collisson, E. A. *et al.* Subtypes of pancreatic ductal adenocarcinoma and their differing  
526 responses to therapy. *Nat. Med.* **17**, 500–503 (2011).
- 527 11. D Antonio, M. *et al.* Identifying DNase I hypersensitive sites as driver distal regulatory  
528 elements in breast cancer. *Nat. Commun.* **8**, 436 (2017).
- 529 12. Rheinbay, E. *et al.* Recurrent and functional regulatory mutations in breast cancer. *Nature*  
530 **547**, 55–60 (2017).
- 531 13. Jones, S. *et al.* Personalized genomic analyses for cancer mutation discovery and  
532 interpretation. *Sci. Transl. Med.* **7**, 283ra53 (2015).
- 533 14. Weinhold, N., Jacobsen, A., Schultz, N., Sander, C. & Lee, W. Genome-wide analysis of  
534 noncoding regulatory mutations in cancer. *Nat. Genet.* **46**, 1160–1165 (2014).
- 535 15. Khurana, E. *et al.* Integrative annotation of variants from 1092 humans: application to  
536 cancer genomics. *Science* **342**, 1235587 (2013).
- 537 16. Feigin, M. E. *et al.* Recurrent noncoding regulatory mutations in pancreatic ductal

- 538 adenocarcinoma. *Nat. Genet.* **49**, 825–833 (2017).
- 539 17. Gruber, A. J. & Zavolan, M. Alternative cleavage and polyadenylation in health and  
540 disease. *Nat. Rev. Genet.* **1** (2019). doi:10.1038/s41576-019-0145-z
- 541 18. Elkon, R., Ugalde, A. P. & Agami, R. Alternative cleavage and polyadenylation: extent,  
542 regulation and function. *Nat Rev Genet.* **14**, 496–506 (2013).
- 543 19. Erson-Bensan, A. E. & Can, T. Alternative Polyadenylation: Another Foe in Cancer.  
544 doi:10.1158/1541-7786.MCR-15-0489
- 545 20. Tian, B. & Manley, J. L. Alternative polyadenylation of mRNA precursors. *Nat. Rev. Mol.*  
546 *Cell Biol.* **18**, 18–30 (2017).
- 547 21. Mayr, C. Evolution and Biological Roles of Alternative 3'UTRs. *Trends Cell Biol.* **26**,  
548 (2016).
- 549 22. Shi, Y. & Manley, J. L. The end of the message: multiple protein-RNA interactions define  
550 the mRNA polyadenylation site. *Genes Dev.* **29**, 889–97 (2015).
- 551 23. Proudfoot, N. J. Ending the message: poly(A) signals then and now. *Genes Dev.* **25**,  
552 1770–82 (2011).
- 553 24. Mayr, C. What Are 3' UTRs Doing? doi:10.1101/cshperspect.a034728
- 554 25. Brumbaugh, J. *et al.* Nudt21 Controls Cell Fate by Connecting Alternative  
555 Polyadenylation to Chromatin Signaling. *Cell* **172**, 106-120.e21 (2018).
- 556 26. Lackford, B. *et al.* Fip1 regulates mRNA alternative polyadenylation to promote stem cell  
557 self-renewal. *EMBO J.* **33**, 878–889 (2014).
- 558 27. Boutet, S. C. *et al.* Alternative polyadenylation mediates microRNA regulation of muscle  
559 stem cell function. *Cell Stem Cell* **10**, 327–36 (2012).
- 560 28. Sandberg, R., Neilson, J. R., Sarma, A., Sharp, P. A. & Burge, C. B. Proliferating cells  
561 express mRNAs with shortened 3' untranslated regions and fewer microRNA target sites.  
562 *Science* **320**, 1643–7 (2008).
- 563 29. Chen, M. *et al.* 3' UTR lengthening as a novel mechanism in regulating cellular  
564 senescence. *Genome Res.* **28**, 285 (2018).
- 565 30. Mayr, C. & Bartel, D. P. Widespread Shortening of 3' UTRs by Alternative Cleavage and  
566 Polyadenylation Activates Oncogenes in Cancer Cells. *Cell* **138**, 673–684 (2009).
- 567 31. Miles, W. O. *et al.* Alternative Polyadenylation in Triple-Negative Breast Tumors Allows  
568 NRAS and c-JUN to Bypass PUMILIO Posttranscriptional Regulation. *Cancer Res.* **76**,  
569 7231–7241 (2016).
- 570 32. Masamha, C. P. *et al.* CFIm25 links alternative polyadenylation to glioblastoma tumour  
571 suppression. *Nature* **510**, 412–416 (2014).

- 572 33. Chen, X. *et al.* CSTF2-Induced Shortening of the RAC1 3'UTR Promotes the  
573 Pathogenesis of Urothelial Carcinoma of the Bladder. *Cancer Res.* **78**, 5848–5862  
574 (2018).
- 575 34. Mitra, M. *et al.* Alternative polyadenylation factors link cell cycle to migration. *Genome*  
576 *Biol.* **19**, 176 (2018).
- 577 35. Li, L. *et al.* 3' UTR shortening identifies high-risk cancers with targeted dysregulation of  
578 the ceRNA network. *Sci. Rep.* **4**, 5406 (2015).
- 579 36. Park, H. J. *et al.* 3' UTR shortening represses tumor-suppressor genes in trans by  
580 disrupting ceRNA crosstalk. *Nat. Genet.* **50**, 783–789 (2018).
- 581 37. Le Pera, L., Mazzapioda, M. & Tramontano, A. 3USS: a web server for detecting  
582 alternative 3'UTRs from RNA-seq experiments. *Bioinformatics* **31**, 1845–7 (2015).
- 583 38. Feng, X., Li, L., Wagner, E. J. & Li, W. TC3A: The Cancer 3' UTR Atlas. *Nucleic Acids*  
584 *Res.* **46**, D1027–D1030 (2017).
- 585 39. Ye, C. *et al.* APATrap: identification and quantification of alternative polyadenylation sites  
586 from RNA-seq data. *Bioinformatics* (2018). doi:10.1093/bioinformatics/bty029
- 587 40. Grassi, E., Mariella, E., Lembo, A., Molineris, I. & Provero, P. Roar: detecting alternative  
588 polyadenylation with standard mRNA sequencing libraries. *BMC Bioinformatics* **17**, 423  
589 (2016).
- 590 41. Xia, Z. *et al.* Dynamic analyses of alternative polyadenylation from RNA-seq reveal a 3' -  
591 UTR landscape across seven tumour types. *Nat. Commun.* **5**, 5274 (2014).
- 592 42. Xue, Z. *et al.* Recurrent tumor-specific regulation of alternative polyadenylation of cancer-  
593 related genes. *BMC Genomics* **19**, 536 (2018).
- 594 43. Lianoglou, S., Garg, V., Yang, J. L., Leslie, C. S. & Mayr, C. Ubiquitously transcribed  
595 genes use alternative polyadenylation to achieve tissue-specific expression. *Genes Dev.*  
596 **27**, 2380–2396 (2013).
- 597 44. Network, T. C. G. A. R. *et al.* The Cancer Genome Atlas Pan-Cancer analysis project.  
598 *Nat. Genet.* **45**, 1113 (2013).
- 599 45. Ardlie, K. G. *et al.* The Genotype-Tissue Expression (GTEx) pilot analysis: Multitissue  
600 gene regulation in humans. *Science (80-. ).* **348**, 648–660 (2015).
- 601 46. Zeng, W. Z. D., Glicksberg, B. S., Li, Y. & Chen, B. Selecting precise reference normal  
602 tissue samples for cancer research using a deep learning approach. *BMC Med.*  
603 *Genomics* **12**, 21 (2019).
- 604 47. Kostj, I., Jain, N., Aran, D., Butte, A. J. & Sirota, M. Cross-tissue Analysis of Gene and

- 605 Protein Expression in Normal and Cancer Tissues. *Sci. Rep.* **6**, 24799 (2016).
- 606 48. Aran, D. *et al.* Comprehensive analysis of normal adjacent to tumor transcriptomes. *Nat.*  
607 *Commun.* **8**, 1077 (2017).
- 608 49. Xiang, Y. *et al.* Comprehensive Characterization of Alternative Polyadenylation in Human  
609 Cancer. *JNCI J. Natl. Cancer Inst.* **110**, 379–389 (2018).
- 610 50. Ji, S. *et al.* ALDOA functions as an oncogene in the highly metastatic pancreatic cancer.  
611 *Cancer Lett.* **374**, 127–135 (2016).
- 612 51. Dey, P., Rachagani, S., Vaz, A. P., Ponnusamy, M. P. & Batra, S. K. PD2/Paf1 depletion  
613 in pancreatic acinar cells promotes acinar-to-ductal metaplasia. *Oncotarget* **5**, 4480–91  
614 (2014).
- 615 52. Nimmakayala, R. K. *et al.* Cigarette Smoke Induces Stem Cell Features of Pancreatic  
616 Cancer Cells via PAF1. *Gastroenterology* **155**, 892-908.e6 (2018).
- 617 53. Vaz, A. P. *et al.* Novel role of pancreatic differentiation 2 in facilitating self-renewal and  
618 drug resistance of pancreatic cancer stem cells. *Br. J. Cancer* **111**, 486–496 (2014).
- 619 54. Hsu, C.-C. *et al.* Functional characterization of Trip10 in cancer cell growth and survival.  
620 *J. Biomed. Sci.* **18**, 12 (2011).
- 621 55. Zhou, A.-X. *et al.* Filamin a mediates HGF/c-MET signaling in tumor cell migration. *Int. J.*  
622 *Cancer* **128**, 839–846 (2011).
- 623 56. Li, C. *et al.* Binding of pro-prion to filamin A disrupts cytoskeleton and correlates with poor  
624 prognosis in pancreatic cancer. *J. Clin. Invest.* **119**, 2725–2736 (2009).
- 625 57. Capello, M. *et al.* Targeting the Warburg effect in cancer cells through ENO1 knockdown  
626 rescues oxidative phosphorylation and induces growth arrest. *Oncotarget* **7**, 5598 (2016).
- 627 58. Chien, Y. & White, M. A. RAL GTPases are linchpin modulators of human tumour-cell  
628 proliferation and survival. *EMBO Rep.* **4**, 800–806 (2003).
- 629 59. Mihaljevic, A. L., Michalski, C. W., Friess, H. & Kleeff, J. Molecular mechanism of  
630 pancreatic cancer—understanding proliferation, invasion, and metastasis. *Langenbeck’s*  
631 *Arch. Surg.* **395**, 295–308 (2010).
- 632 60. Maurer, H. C. & Olive, K. P. Laser Capture Microdissection on Frozen Sections for  
633 Extraction of High-Quality Nucleic Acids. in 253–259 (2019). doi:10.1007/978-1-4939-  
634 8879-2\_23
- 635 61. Vandenberg, C. A. Integrins step up the pace of cell migration through polyamines and  
636 potassium channels. *Proc. Natl. Acad. Sci. U. S. A.* **105**, 7109–10 (2008).
- 637 62. Seshacharyulu, P., Pandey, P., Datta, K. & Batra, S. K. Phosphatase: PP2A structural  
638 importance, regulation and its aberrant expression in cancer. *Cancer Lett.* **335**, 9–18

- 639 (2013).
- 640 63. Yu, S. *et al.* PPP2R2D, a regulatory subunit of protein phosphatase $\gamma$ 1/2A, promotes  
641 gastric cancer growth and metastasis via mechanistic target of rapamycin activation. *Int.*  
642 *J. Oncol.* **52**, 2011–2020 (2018).
- 643 64. Brett-Morris, A. *et al.* The Polyamine Catabolic Enzyme SAT1 Modulates Tumorigenesis  
644 and Radiation Response in GBM. *Cancer Res.* **74**, 6925–6934 (2014).
- 645 65. Phanstiel, O. An overview of polyamine metabolism in pancreatic ductal adenocarcinoma.  
646 *UICC Int. J. Cancer IJC* **142**, 1968–1976 (2018).
- 647 66. Fahrman, J. F. *et al.* A Plasma-Derived Protein-Metabolite Multiplexed Panel for Early-  
648 Stage Pancreatic Cancer. *JNCI J. Natl. Cancer Inst.* (2018). doi:10.1093/jnci/djy126
- 649 67. Hinohara, K. & Polyak, K. Intratumoral Heterogeneity: More Than Just Mutations. *Trends*  
650 *Cell Biol.* **29**, 569–579 (2019).
- 651 68. Easwaran, H., Tsai, H.-C. & Baylin, S. B. Cancer epigenetics: tumor heterogeneity,  
652 plasticity of stem-like states, and drug resistance. *Mol. Cell* **54**, 716–27 (2014).
- 653 69. McGranahan, N. & Swanton, C. Clonal Heterogeneity and Tumor Evolution: Past,  
654 Present, and the Future. *Cell* **168**, 613–628 (2017).
- 655 70. Eisenberg, E. & Levanon, E. Y. Human housekeeping genes, revisited. *Trends Genet.*  
656 **29**, 569–574 (2013).
- 657 71. Zhu, J., He, F., Song, S., Wang, J. & Yu, J. How many human genes can be defined as  
658 housekeeping with current expression data? *BMC Genomics* **9**, 172 (2008).
- 659 72. Mayr, C., Hemann, M. T. & Bartel, D. P. Disrupting the Pairing Between let-7 and Hmga2  
660 Enhances Oncogenic Transformation. *Science (80-. )*. **315**, 1576–1579 (2007).
- 661 73. Lee, Y. S. & Dutta, A. The tumor suppressor microRNA let-7 represses the HMGA2  
662 oncogene. *Genes Dev.* **21**, 1025–1030 (2007).
- 663 74. Pereira, B., Billaud, M. & Almeida, R. RNA-Binding Proteins in Cancer: Old Players and  
664 New Actors. *Trends in cancer* **3**, 506–528 (2017).
- 665 75. Matoulkova, E., Michalova, E., Vojtesek, B. & Hrstka, R. The role of the 3' untranslated  
666 region in post-transcriptional regulation of protein expression in mammalian cells. *RNA*  
667 *Biol.* **9**, 563–576 (2012).
- 668 76. Tsai, W.-C. *et al.* MicroRNA-122, a tumor suppressor microRNA that regulates  
669 intrahepatic metastasis of hepatocellular carcinoma. *Hepatology* **49**, 1571–1582 (2009).
- 670 77. Zhang, Y. *et al.* Profiling of 95 MicroRNAs in Pancreatic Cancer Cell Lines and Surgical  
671 Specimens by Real-Time PCR Analysis. *World J. Surg.* **33**, 698–709 (2009).
- 672 78. Dangi-Garimella, S., Strouch, M. J., Grippo, P. J., Bentrem, D. J. & Munshi, H. G.



- 673 Collagen regulation of let-7 in pancreatic cancer involves TGF- $\beta$ 1-mediated membrane  
674 type 1-matrix metalloproteinase expression. *Oncogene* **30**, 1002–8 (2011).
- 675 79. Wang, Q. *et al.* MicroRNA-664 targets paired box protein 6 to inhibit the oncogenicity of  
676 pancreatic ductal adenocarcinoma. *Int. J. Oncol.* **54**, 1884–1896 (2019).
- 677 80. Qin, Y., Dang, X., Li, W. & Ma, Q. miR-133a Functions as a Tumor Suppressor and  
678 Directly Targets FSCN1 in Pancreatic Cancer. *Oncol. Res. Featur. Preclin. Clin. Cancer*  
679 *Ther.* **21**, 353–363 (2014).
- 680 81. Wang, X. *et al.* mir-329 restricts tumor growth by targeting grb2 in pancreatic cancer.  
681 *Oncotarget* **7**, 21441–53 (2016).
- 682 82. Baradaran, B., Shahbazi, R. & Khordadmehr, M. Dysregulation of key microRNAs in  
683 pancreatic cancer development. *Biomed. Pharmacother.* **109**, 1008–1015 (2019).
- 684 83. Hu, Y., Ou, Y., Wu, K., Chen, Y. & Sun, W. miR-143 inhibits the metastasis of pancreatic  
685 cancer and an associated signaling pathway. *Tumor Biol.* **33**, 1863–1870 (2012).
- 686 84. Schultz, N. A. *et al.* MicroRNA Biomarkers in Whole Blood for Detection of Pancreatic  
687 Cancer. *JAMA* **311**, 392 (2014).
- 688 85. Wu, D.-H. *et al.* miR-124 Suppresses Pancreatic Ductal Adenocarcinoma Growth by  
689 Regulating Monocarboxylate Transporter 1-Mediated Cancer Lactate Metabolism. *Cell.*  
690 *Physiol. Biochem.* **50**, 924–935 (2018).
- 691 86. Kent, O. A., McCall, M. N., Cornish, T. C. & Halushka, M. K. Lessons from miR-143/145:  
692 the importance of cell-type localization of miRNAs. *Nucleic Acids Res.* **42**, 7528–7538  
693 (2014).
- 694 87. Pham, H. *et al.* miR-143 decreases COX-2 mRNA stability and expression in pancreatic  
695 cancer cells. *Biochem. Biophys. Res. Commun.* **439**, 6–11 (2013).
- 696 88. Kojima, S. *et al.* Tumour suppressors miR-1 and miR-133a target the oncogenic function  
697 of purine nucleoside phosphorylase (PNP) in prostate cancer. *Br. J. Cancer* **106**, 405–  
698 413 (2012).
- 699 89. Kent, O. A. *et al.* Repression of the miR-143/145 cluster by oncogenic Ras initiates a  
700 tumor-promoting feed-forward pathway. *Genes Dev.* **24**, 2754–2759 (2010).
- 701 90. Steinhart, Z. *et al.* Genome-wide CRISPR screens reveal a Wnt–FZD5 signaling circuit as  
702 a druggable vulnerability of RNF43-mutant pancreatic tumors. *Nat. Med.* **23**, 60–68  
703 (2017).
- 704 91. Schitteck, B. & Sinnberg, T. Biological functions of casein kinase 1 isoforms and putative  
705 roles in tumorigenesis. *Mol. Cancer* **13**, 231 (2014).
- 706 92. Knippschild, U. *et al.* The casein kinase 1 family: participation in multiple cellular

- 707 processes in eukaryotes. *Cell. Signal.* **17**, 675–689 (2005).
- 708 93. Cai, J. *et al.* CK1 $\alpha$  suppresses lung tumour growth by stabilizing PTEN and inducing  
709 autophagy. *Nat. Cell Biol.* **20**, 465–478 (2018).
- 710 94. Lantermann, A. B. *et al.* Inhibition of Casein Kinase 1 Alpha Prevents Acquired Drug  
711 Resistance to Erlotinib in EGFR-Mutant Non-Small Cell Lung Cancer. *Cancer Res.* **75**,  
712 4937–4948 (2015).
- 713 95. Järås, M. *et al.* Csnk1a1 inhibition has p53-dependent therapeutic efficacy in acute  
714 myeloid leukemia. *J. Exp. Med.* **211**, 605–12 (2014).
- 715 96. Jiang, S., Zhang, M., Sun, J. & Yang, X. Casein kinase 1 $\alpha$ : biological mechanisms and  
716 theranostic potential. *Cell Commun. Signal.* **16**, 23 (2018).
- 717 97. Lefebvre, C. *et al.* A human B - cell interactome identifies MYB and FOXM1 as master  
718 regulators of proliferation in germinal centers. *Mol. Syst. Biol.* **6**, 377 (2010).
- 719 98. Margolin, A. A. *et al.* ARACNE: An Algorithm for the Reconstruction of Gene Regulatory  
720 Networks in a Mammalian Cellular Context. *BMC Bioinformatics* **7**, S7 (2006).
- 721 99. Alvarez, M. J. *et al.* Functional characterization of somatic mutations in cancer using  
722 network-based inference of protein activity. *Nat. Genet.* **48**, 838–847 (2016).
- 723 100. Rena, G., Bain, J., Elliott, M. & Cohen, P. D4476, a cell-permeant inhibitor of CK1,  
724 suppresses the site-specific phosphorylation and nuclear exclusion of FOXO1a. *EMBO*  
725 *Rep.* **5**, 60–65 (2004).
- 726 101. Yaffe, M. B. Why geneticists stole cancer research even though cancer is primarily a  
727 signaling disease. *Sci. Signal.* **12**, eaaw3483 (2019).
- 728 102. Chu, Y. *et al.* Nudt21 regulates the alternative polyadenylation of Pak1 and is predictive  
729 in the prognosis of glioblastoma patients. *Oncogene* **38**, 4154–4168 (2019).
- 730 103. Tan, S. *et al.* NUDT21 negatively regulates PSMB2 and CXXC5 by alternative  
731 polyadenylation and contributes to hepatocellular carcinoma suppression. *Oncogene* **37**,  
732 4887–4900 (2018).
- 733 104. Passacantilli, I. *et al.* Alternative polyadenylation of ZEB1 promotes its translation during  
734 genotoxic stress in pancreatic cancer cells. *Cell Death Dis.* **8**, e3168 (2017).
- 735 105. Sinnberg, T. *et al.* Suppression of Casein Kinase 1 in Melanoma Cells Induces a Switch  
736 in  $\beta$ -Catenin Signaling to Promote Metastasis. *Cancer Res.* **70**, 6999–7009 (2010).
- 737 106. Yong, T. J., Gan, Y. Y., Toh, B. H. & Sentry, J. W. Human CKI $\alpha$ (L) and CKI $\alpha$ (S)  
738 are encoded by both 2.4- and 4.2-kb transcripts, the longer containing multiple RNA-  
739 destabilising elements. *Biochim. Biophys. Acta* **1492**, 425–33 (2000).
- 740 107. Mi, H., Muruganujan, A., Ebert, D., Huang, X. & Thomas, P. D. PANTHER version 14:

- 741 more genomes, a new PANTHER GO-slim and improvements in enrichment analysis  
742 tools. *Nucleic Acids Res.* **47**, D419–D426 (2019).
- 743 108. Mi, H. & Thomas, P. PANTHER Pathway: An Ontology-Based Pathway Database  
744 Coupled with Data Analysis Tools. *Methods Mol Biol.* **563**, 123–140 (2009).
- 745 109. Fan, J. & Lv, J. Sure independence screening for ultrahigh dimensional feature space. *J.*  
746 *R. Stat. Soc. Ser. B (Statistical Methodol.* **70**, 849–911 (2008).
- 747 110. Love, M. I., Huber, W. & Anders, S. Moderated estimation of fold change and dispersion  
748 for RNA-seq data with DESeq2. *Genome Biol.* **15**, 550 (2014).
- 749 111. The Gene Ontology Consortium. The Gene Ontology Resource: 20 years and still GOing  
750 strong. *Nucleic Acids Res.* **47**, D330–D338 (2019).
- 751 112. Ashburner, M. *et al.* Gene Ontology: tool for the unification of biology. *Nat. Genet.* **25**, 25–  
752 29 (2000).
- 753
- 754

755 **FIGURE LEGENDS**

756 **Figure 1. Integrative analysis of RNA-seq data identifies 3'-UTR alterations associated**  
757 **with PDA.** (A) A plot of PDUI score of each gene in human tumor and normal samples. Dashed  
758 lines represent 0.1 cutoffs. Blue dots represent 3'-UTR lengthened genes while red dots  
759 represent 3'-UTR shortened genes. (B) A volcano plot denoting 3'-UTR shortened (red) and  
760 lengthened (blue) gene hits (FDR<0.01) whose  $|\Delta\text{PDUI}| > 0.1$ . (C) A plot showing the number of  
761 base pairs lost/gained by 3'-UTR altered genes. (D) UCSC genome browser plot depicting the  
762 3'-UTR RNA-seq density profile of two 3'-UTR shortened genes (*FLNA* and *PAF1*) to highlight  
763 the coverage differences between tumor (orange) and normal (purple) patient samples. (E)  
764 UCSC genome browser plot highlighting the 3'-UTR profile differences between *FLNA* and  
765 *PAF1* in a micro-dissected dataset in patient tumor (red) and stroma (blue). (F) 3'-RACE of  
766 altered PDA-associated genes in MiaPaCa2 and Suit2 cells (representative images, n=3).  
767 Approximate length of the 3'-UTR form is denoted beside each band. (G) 3'-RACE of select  
768 genes in primary patient samples.

769  
770 **Figure 2. 3'-UTR changes are widespread among PDA patients and enriched in PDA**  
771 **pathways.** (A) The heatmap shows genes (rows) undergoing 3'-UTR shortening (red) or  
772 lengthening (blue) in each patient tumor (columns) compared to median score in normal  
773 pancreas for that gene. The profile of *KRAS*, *CDKN2A*, *TP53*, *SMAD4* mutations as well as  
774 tumor subtype is shown in the context of distinct APA-derived patient subgroups. (B)  
775 Significantly enriched (FDR<0.05) reactome pathways associated with 3'-UTR altered genes.

776  
777 **Figure 3. APA events identify a poor prognostic cohort in PDA patients.** (A) Patients were  
778 clustered based on 3'-UTR short (red) and long forms (blue) of 3'-UTR altered genes (clustered  
779 into gene groups 1,2,3) and segregated into patient cohort A (blue), patient cohort B (black) and  
780 patient cohort C (green). (B) Kaplan-Meier survival plot for patient cohort A (blue), patient cohort  
781 B (black) and patient cohort C (green) (\*p<0.05).

782  
783 **Figure 4. PDA patients show substantial heterogeneity in the extent of proximal PAS**  
784 **usage of metabolic genes.** (A) Example of a 3'-UTR shortened gene (*ALDOA*) that has a tight  
785 distribution of its proximal PAS usage in normal pancreas (purple) as well as PDA patients  
786 (orange). (B) A 3'-UTR shortened gene (*FLNA*) that has a tight distribution in normal pancreas  
787 (purple); however, the extent of proximal PAS usage varies greatly across PDA patients  
788 (orange). (C) Plot of variance in PDUI for all genes between tumor and normal. Purple dots

789 represent genes with high variance in normal samples while orange dots represent genes with  
790 high variance in tumor samples. Dashed lines represent 0.015 and -0.015 cutoffs.

791

792 **Figure 5. APA drives altered gene expression in PDA.** (A) Log fold change in gene  
793 expression is plotted against  $\Delta$ PDI for 3'-UTR altered genes. Overexpressed genes (red dots)  
794 and underexpressed genes (blue dots) on the left represent 3'-UTR shortened hits while those  
795 to the right represent 3'-UTR lengthened hits. (B) Quantification of 3'-UTR altered genes that  
796 are overexpressed (red) or underexpressed (blue) in PDA tumors. (C) Schematic illustrating the  
797 luciferase reporter constructs. (D) Normalized fold expression change of the luciferase reporter  
798 (short 3'-UTRs / long-3'UTRs) for the selected list of 3'-UTR altered genes (n=3). The long 3'-  
799 UTR expression for each gene is normalized to 1. Each whisker plot denotes the median as the  
800 center line and the minimum and maximum values as the whiskers (\*p<0.05,  
801 \*\*p<0.01,\*\*\*p<0.005, \*\*\*\*p<0.001). (E) Schematic showing the *ALDOA* 3'-UTR with positions of  
802 conserved miRNA sites as well as the miRNA mutant construct used. (F) Fold expression  
803 change of miRNA mutant construct compared to the PAS mutant in luciferase assays (n=3).  
804 The PAS mutant expression is normalized to 1.

805

806 **Figure 6. APA-mediated loss of tumor suppressive miRNA binding sites is associated**  
807 **with poor patient outcome.** (A) Number of genes that lose highly conserved miRNA binding  
808 sites due to 3'-UTR shortening. The percentage of genes that lose at least 1 miRNA binding site  
809 is indicated above the bracket. (B) Highly conserved miRNA families were plotted against their  
810 Z-score, an index of the lost binding sites where a more negative Z-score indicates more  
811 significant binding site loss. (C) tSNE plot depicting TCGA patient clusters in the highly  
812 conserved miRNA feature space. (D) Kaplan-Meier survival plot for the 3 patient clusters  
813 identified in (C) (\*p<0.05 for Cluster 1 to Cluster 3 comparison). (E) Heatmap depicting the  
814 association of miRNA binding site loss (miR score) with patient clusters.

815

816 **Figure 7. CK1 $\alpha$  is required for cell proliferation and is a putative drug target in PDA.** (A) A  
817 plot showing *CSNK1A1* gene expression (in transcripts per million) in PDA (red) as compared to  
818 PanIN lesions (green) in the epithelium and stroma from micro-dissected samples (\*\*\*\*p<0.001).  
819 (B) MARINA plot showing CK1 $\alpha$  targets (blue: negative targets, red: positive targets) ranked by  
820 their differential gene expression from precursors (left) to PDA epithelium (right). (C) Dose-  
821 response of MiaPaCa2 (purple) and Suit2 (red) cell lines to the CK1 $\alpha$  small molecule inhibitor,  
822 D4476 (n=3). (D) Cell proliferation of Suit2 cells treated with indicated doses of D4476 (n=3,

823 \*\*\*\*p<0.001). (E) Clonogenic growth assay of Suit2 cells treated with indicated drug doses. (F)  
824 Quantification shows the number of colonies in (E) (n=3, \*\*\*p<0.005, \*\*\*\*p<0.001). (G) A  
825 representative blot confirming CK1 $\alpha$  knockdown in Suit2 cells with a non-targeting control  
826 shRNA (Con shRNA) or with one of three different shRNAs targeting *CSNK1A1* (n=3). (H) Cell  
827 proliferation of Suit2 control and CK1 $\alpha$  knockdown cells (n=3, \*\*\*p<0.005). (I) Clonogenic  
828 growth assay of control and CK1 $\alpha$  knockdown cells (n=3). (J) Quantification shows the number  
829 of colonies in (I) (\*\*\*\*p<0.001).

830

### 831 **Supplementary Figure Legends**

832 **Supplementary Figure 1. Analysis flowchart.** We identically processed raw RNA-seq data  
833 from the GTEx and TCGA-PAAD cohorts to analyze APA events in PDA. Predicted genes were  
834 further validated using a smaller high purity TCGA cohort and an independent micro-dissected  
835 dataset. The resulting genes were interrogated for associated APA trends, prognostic  
836 significance and gene expression changes.

837

838 **Supplementary Figure 2. Gene hits in the high purity TCGA-PAAD subset.** (A) Volcano plot  
839 depicting significant gene hits (FDR<0.01) whose  $|\Delta\text{PDU}| > 0.1$  in the 69 high purity samples (>  
840 33% tumor content). (B) Venn diagram representing the overlap in significant gene hits between  
841 the DaPars analysis of 148 TCGA-PAAD samples and the 69 high purity TCGA-PAAD dataset.  
842 (C) 3'-UTR schematic and sequence of 3 example candidate genes (*FLNA*, *PPP2R2D* and  
843 *PAF1*). The stop codon is highlighted in blue and marks the beginning of the 3'-UTR sequence.  
844 The functional PAS sites estimated from 3'-RACE forms are highlighted in red.

845

846 **Supplementary Figure 3. CK1 $\alpha$  is required for cell proliferation and is a putative drug**  
847 **target in PDA.** (A) 3' RACE of *CSNK1A1* in Suit2 and MiaPaCa2 cells (representative images  
848 from 3 independent experiments). (B) Cell proliferation of MiaPaCa2 cells treated with indicated  
849 doses of D4476 (n=3, \*\*\*\*p<0.001). (C) Clonogenic growth assay of MiaPaCa2 cells treated  
850 with indicated drug doses. (D) A representative blot (n=3) confirming CK1 $\alpha$  knockdown in  
851 MiaPaCa2 cells with a non-targeting control shRNA (Con shRNA) or one of three different  
852 shRNAs targeting *CSNK1A1*. (E) Cell proliferation of MiaPaCa2 control and CK1 $\alpha$  knockdown  
853 cells (n=3, \*\*\*p<0.005). (F) Clonogenic growth assay of MiaPaCa2 control and CK1 $\alpha$   
854 knockdown cells (n=3).

855

856 **Supplementary Figure 4. APA factor expression in PDA.** Fold expression change of core  
857 APA factors between TCGA (tumor) and GTEx (normal pancreas). Dotted lines represent 1.5-  
858 fold (red) and 0.66-fold (blue) cutoffs.  
859

## 860 **MATERIALS AND METHODS**

### 861 **Data collection and preprocessing**

862 Our study focused on PDA tumors consistent with the histology of PDA (n=148). All RNA-seq  
863 files were downloaded via NCBI dbGAP. This included 184 normal pancreata SRA files from  
864 GTEx (dbGAP accession phs000424.v8.p2) and 148 BAM files within the TCGA-PAAD cohort  
865 (<https://portal.gdc.cancer.gov/>). GTEx SRA files were aligned exactly according to the TCGA  
866 RNA-seq alignment pipeline using GENCODE.v22 annotations. Bedgraph files were generated  
867 using bedtoolsv2.26 and were supplied as input to the DaPars algorithm.

868

### 869 **DaPars analysis**

870 DaPars processes bedgraph coverage files to identify differences in 3'-UTR lengths between  
871 two conditions. The output of our analysis contained putative 3'-UTR altered transcripts and was  
872 comprised of 2573 unique genes. The subset of genes that were significantly altered in their  
873 PDUI scores were calculated using Fisher's exact test ( $|\Delta\text{PDUI}| > 0.1$ ,  $\text{FDR} < 0.05$ ) between  
874 normal and PDA tumors. A similar analysis was performed with a subset of 69 high purity PDA  
875 tumor samples.

876

### 877 **Bioinformatics analyses and statistical methods**

878 **Analysis of heterogeneity.** The variances in proximal PAS usage across tumor samples  
879 ( $\text{Var}(\text{Tumor})$ ) as well as normal samples ( $\text{Var}(\text{Normal})$ ) were computed for each gene and the  
880 difference ( $\text{Var}(\text{Normal}) - \text{Var}(\text{Tumor})$ ) was plotted (R version 3.5.2).

881 **Heatmap analysis.** A heatmap representing the extent of 3'-UTR alterations across PDA  
882 patients was generated (R version 3.4.3). For each significant gene hit (row), the median GTEx  
883 PDUI score was subtracted from the PDUI score for each TCGA PDA patient to obtain a  
884 measure of  $\Delta\text{PDUI}$  (change in 3'-UTR length for that gene for each patient). Hierarchical  
885 clustering of patients (columns) segregated them into 5 distinct subgroups. Rows were similarly  
886 clustered to yield subsets of genes undergoing a higher degree of 3'-UTR shortening (red) or  
887 lengthening (blue). The mutational status of commonly altered PDA genes and PDA subtype for  
888 each TCGA patient was highlighted.

889 **Pathway analysis.** PANTHER (Protein ANalysis Through Evolutionary Relationships) was used  
890 for pathway analysis<sup>107,108</sup>. The statistical overrepresentation test was used to statistically  
891 determine over or under-representation of reactome pathways in comparison to the reference  
892 list (all human genes in the PANTHER database) using Fisher's exact test ( $\text{FDR} < 0.05$ ).



893 **Survival analysis.** We selected genes with significant 3'-UTR shortening for multivariate  
894 survival time model building by first computing the residuals from a multivariate proportional  
895 hazards model fit to clinical factors (age, stage, grade, surgical outcome, race and sex) and  
896 selecting only those genes with significant univariate correlation with this clinically unexplainable  
897 prognostic signal. We then used K-means clustering among selected genes to define 3  
898 prognosis groups based on the within/between sum of squares criterion. The prognostic value of  
899 this classification is described by standard Kaplan-Meier plot and the log-rank test.

900 **Differential gene expression analysis.** Differential gene expression analysis between TCGA-  
901 PAAD and GTEx normal pancreas samples was performed using DESeq2. Genes showing (1)  
902 Fold change > 1.5 (2) FDR<0.05 (3) log<sub>2</sub>CPM > 3 were considered differentially expressed. The  
903 association between PDUI score and gene expression was plotted in R version 3.4.3.

904 **Percentage of lost miRNA sites.** Highly conserved miRNA binding sites and their genomic  
905 positions were downloaded from TargetScanHuman 7.2. This list, along with DaPars prediction  
906 of genomic coordinates of lost 3'-UTRs was used to plot the number of genes that lose at least  
907 1 highly conserved miRNA binding site.

908 **miRNA families preferentially associated with lost sites.** In order to determine miRNAs  
909 associated with sites enriched in lost 3'-UTRs, miRNA target predictions and the cumulative  
910 weighted context++ scores (CWCS) were downloaded from TargetScanHuman 7.2. CWCS  
911 estimates the predicted cumulative repression for a miRNA at the site. The lost miRNA binding  
912 sites in the shortened 3'-UTRs of PDA patients were inferred from DaPars predictions. A  
913 weighted target site score was computed as the sum over all genes with shortened 3'-UTRs in  
914 tumor, with the CWCS of each target site for the miRNA multiplied by the normalized  
915 abundance of the gene's 3'-UTR form in which the predicted target site was present. The fold-  
916 change (f) of the sum of weighted target site scores in lost 3'-UTR regions for PDA tumor over  
917 normal was calculated. The labels of the miRNA target sites were permuted to assess the  
918 significance of the fold-change. 1000 such randomizations were performed and the mean (m)  
919 and standard deviation (s) of the fold changes across the randomized data sets was computed.  
920 The significance of the fold change was computed in form of the Z-score defined as (f-m)/s. A  
921 lower Z-score indicates that the loss in miRNA binding sites is higher than that expected by  
922 chance.

923 **miRNA prognostic signature.** We quantified the impact of APA-based loss of miRNA binding  
924 as follows:

925 
$$X_{m,i} = \sum_g (1 - PDUI_{i,g}) \times A_{g,m}$$

926 where  $A_{g,m}$  is an indicator function that the short versus long 3'-UTR of the gene  $g$  contains the  
927 binding site for miRNA  $m$ , the impact to the  $i^{\text{th}}$  person is  $X_{m,i}$ . We used Sure Independence  
928 Screening (SIS) to search through all affected miRNAs and identify features that were  
929 associated with survival univariately<sup>109</sup>. To study the multivariate effect, we reorganized cases  
930 using the euclidean distance between SIS selected features, visualized with tSNE, and defined  
931 clusters with model-based Gaussian clustering using the BIC criterion to select cluster number.  
932 Survival differences were tested across all groups by the log-rank test and were visualized by  
933 Kaplan-Meier estimate. The pattern of loss of miRNA binding sites across patient clusters were  
934 visualized for a subset of miRNAs in a heatmap.

935 **MARINA plot.** The pancreatic cancer regulatory network was reverse engineered by ARACNe-  
936 AP from 242 microdissected epithelial gene expression profiles which were generated from 197  
937 primary PDA, 26 low-grade PanIN and 19 low-grade IPMN lesions<sup>5,60,98</sup>. Raw counts were  
938 normalized to account for different library sizes after filtering out genes with less than one  
939 fragment per million mapped fragments in at least 20% of the samples, and the variance was  
940 stabilized by fitting the dispersion to a negative binomial distribution as implemented in the  
941 DESeq2 R package<sup>110</sup>. ARACNe was run with standard settings (using data processing  
942 inequality (DPI), with 100 bootstrap iterations using all gene symbols mapping to a set of 1856  
943 transcription factors that includes genes annotated in the Gene Ontology (GO) molecular  
944 function database as GO:0003700 ('transcription factor activity'), GO:0004677 ('DNA binding'),  
945 GO:0030528 ('transcription regulator activity') or as GO:0004677/GO: 0045449 ('regulation of  
946 transcription'), 671 transcriptional cofactors (a manually curated list, not overlapping with the  
947 transcription factor list, built upon genes annotated as GO:0003712, 'transcription cofactor  
948 activity', or GO:0030528 or GO:0045449) or 3,540 signaling pathway related genes (annotated  
949 in GO Biological Process database as GO:0007165 'signal transduction' and in GO cellular  
950 component database as GO:0005622, 'intracellular', or GO:0005886, 'plasma membrane') as  
951 candidate regulators<sup>111,112</sup>. Thresholds for the tolerated DPI and mutual information P value  
952 were set to 0 and 10<sup>-8</sup>, respectively. For master regulatory analysis, we tested the differential  
953 activity for CK1 $\alpha$  between precursor lesions and PDA by applying the multi-sample version of  
954 the VIPER algorithm (msVIPER)<sup>99</sup>. msVIPER considers the distribution of negative and positive  
955 targets of CK1 $\alpha$  in the progression gene expression signature to infer its activity.

956

## 957 **Experimental methods**

### 958 **Cell lines, antibodies and general reagents.**

959 MiaPaCa2 and HEK293 cells were purchased from ATCC and cultured in DMEM media (Cat#  
960 MT 10-013-CV, Corning) and 10% fetal bovine serum. Suit2 cells were obtained from Dr. David  
961 Tuveson (Cold Spring Harbor Laboratory). Cell lines were periodically verified to be  
962 mycoplasma free using the Mycoalert kit (Cat# LT07-701, Lonza). All transfections were carried  
963 out using Lipofectamine 3000 (Cat# L3000008, Thermo Fisher Scientific) as per manufacturers  
964 protocol. All primers used in this study were purchased from Integrated DNA Technologies (IDT)  
965 and PCR reactions were performed using Q5 Hot start DNA polymerase (Cat# M0493L, NEB).  
966 cDNA synthesis was carried out using Superscript II Reverse Transcriptase (Cat# 18064022,  
967 Thermo Fisher Scientific). miRNA site mutations in *ALDOA* 3'-UTR as well as mutations at the  
968 proximal PAS of long 3'-UTRs were introduced using NEB Builder HiFi DNA assembly (Cat#  
969 E2621S, NEB). The *Renilla* reporter plasmid pIS1 (Plasmid# 12179) as well as the firefly  
970 plasmid pIS0 (Plasmid# 12178) were purchased from Addgene. Luciferase assays were  
971 performed using Dual Luciferase Reporter Assay System (Cat# E1910, Promega). For  
972 *CSNK1A1* drug studies, the small molecule inhibitor D4476 (Cat# 13305, Cayman Chemical)  
973 was dissolved in DMSO (Cat# S1078, Selleckchem) at a stock concentration of 20mM. For  
974 dose-response measurements and certain cell proliferation experiments, cell viability was  
975 assessed using CellTiter-Glo (Cat# G7571, Promega). 3 distinct predesigned shRNAs  
976 (sh1:Cat# V2LHS\_176052, sh2:Cat# V2LHS\_221905, sh3:Cat# V2LHS\_263361) against  
977 *CSNK1A1* were procured from a commercial shRNA library (Dharmacon) from the Roswell Park  
978 Gene Modulation core. Primary antibodies used in this study included a polyclonal antibody  
979 against CK1 $\alpha$  (Cat# A301-991A-M, Bethyl labs) and a monoclonal antibody against  $\beta$ -actin  
980 (Cat# 3700S, Cell Signaling Technology). Secondary antibodies included horseradish  
981 peroxidase-conjugated goat anti-mouse (Cat# A4416, Sigma) and goat anti-rabbit (Cat# 45-000-  
982 682, Fisher Scientific) antibodies.

983

#### 984 **Cell lysis and RNA extraction.**

985 MiaPaCa2 and Suit2 cells were grown to 100% confluence in 10cm plates. The cells were  
986 washed with 10mL PBS, and 1mL TRIzol was added to the cell culture plate. Cells were  
987 scraped, then incubated in a 1.5mL microcentrifuge tube for 5 minutes. 0.2mL of chloroform was  
988 added, mixed well and the tubes were incubated at room temperature for 2-3 minutes. The  
989 samples were centrifuged at 12000xg for 15 minutes at 4°C and the upper aqueous phase was  
990 transferred to a fresh tube. After addition and incubation with 0.5mL of isopropanol for 10  
991 minutes, the samples were again centrifuged for 10 minutes. The supernatant was removed and

992 the RNA pellet was washed with 75% ethanol. The pellet was dissolved in RNase-free water  
 993 and the quality of RNA was assessed using a NanoDrop spectrophotometer.

994

995 **3' RACE assays.**

996 cDNA was generated from 1µg RNA from MiaPaCa2 as well as Suit2 cell lines using  
 997 Superscript II Reverse Transcriptase (Cat# 18064022, ThermoFisher Scientific) using the primer  
 998 P: 5'- GACTCGAGTCGACATCGATTTTTTTTTTTTTTTTTTTT-3'. To PCR amplify the 3'-UTR forms  
 999 of candidate genes, a gene specific forward primer spanning the stop codon of the gene was  
 1000 used in conjunction with a reverse primer P': 5'- GACTCGAGTCGACATCG-3' targeting the  
 1001 adapter region introduced by primer P. The PCR mixture was run on a 1.5% agarose gel and  
 1002 visualized using the Chemidoc imaging system followed by analysis with Image Lab software  
 1003 (Version 6.0.0, Bio-Rad). An identical cDNA generation and PCR procedure was followed for  
 1004 RNA extracted from PDA patient tumor samples. RNA from PDA patient samples were obtained  
 1005 from Roswell Park Pathology Shared Resource. Approval of biospecimen use was granted by  
 1006 the Roswell Park IRB.

1007

1008 **Constructs for reporter assays.**

1009 The long and short 3'-UTRs were PCR amplified from genomic DNA or BAC DNAs procured  
 1010 from RPCI-11 human BAC library resource at Roswell Park and subcloned into the *Renilla*  
 1011 luciferase vector pIS1 (Plasmid# 12179, Addgene) between the XbaI/EcoRV and NotI restriction  
 1012 sites. The primers were designed in accordance with 3'-UTR length estimates obtained from the  
 1013 3' RACE. The following primers were used:

1014

|                     |                                       |
|---------------------|---------------------------------------|
| PPP2R2DFwdXbaI      | taagcaTCTAGAagacgcgaacgtgagga         |
| PPP2R2DShortRevNotI | tgcttaGCGGCCGCcaataacttttctcttgatgtaa |
| PPP2R2DLongRevNotI  | tgcttaGCGGCCGCgaagaaccctgcataactcattc |
| SAT1FwdXbaI         | taagcaTCTAGAaatgtgctgcacttaagaatac    |
| SAT1ShortRevNotI    | tgcttaTCTAGAAAatgtgatttaacacaattac    |
| SAT1LongRevNotI     | tgcttaTCTAGActgaccaatcaacagggacc      |
| ALDOAFwdXbaI        | taagcaTCTAGAgcggagggtgtcccaggctgc     |
| ALDOAShortRevNotI   | tgcttaTCTAGAccacaagacacggacggccgac    |
| ALDOALongRevNotI    | tgcttaGCGGCCGCctgttaggtgaaggggcagagcc |
| TRIP10FwdXbaI       | taagcaTCTAGAaccctgccagagacgggaag      |
| TRIP10ShortRevNotI  | tgcttaTCTAGAGaaaacgtggtgttagatactcc   |
| TRIP10LongRevNotI   | tgcttaTCTAGAcctgggcaactgggtgagac      |

|                     |                                       |
|---------------------|---------------------------------------|
| PAF1EcoRVXbal       | taagcaGATATCCAGTGAAGtcccagggc         |
| PAF1ShortRevNotI    | tgcttaGCGGCCGCacctgggggttgctgggaggt   |
| PAF1LongRevNotI     | TGCTTAGCGGCCGCgtggccctgggaacctggct    |
| ENO1FwdEcoRV        | taagcaGATATCGAAACCCCTTGCCAAGTAA       |
| ENO1ShortRevNotI    | TGCTTAGCGGCCGCcctgaacactaaggacagacc   |
| ENO1LongRevNotI     | TGCTTAGCGGCCGCccttctggcttgaatatggc    |
| RALGDSFwdXbal       | taagcaTCTAGAgggcatcctcccagggc         |
| RALGDS ShortRevNotI | tgcttaGCGGCCGCttgcccctcccacatcag      |
| RALGDS LongRevNotI  | tgcttaGCGGCCGCctggataaccctgcaagggctcc |
| FLNA FwdXbal        | taagcaTCTAGAgctctggggcccggtcca        |
| FLNA ShortRevNotI   | tgcttaGCGGCCGCccaacaagctacagccacgc    |
| FLNA LongRevNotI    | tgcttaGCGGCCGCcctgcctcggcctcccga      |

1015

1016 **Luciferase reporter assays.**

1017 MiaPaCa2 cells were seeded at ~10000 cells per well in a 96-well white plate (Cat# 07-200-628,  
1018 Fisher Scientific). The cells were transfected the next day at ~ 60% confluency with 200ng of  
1019 *Renilla* luciferase reporter plasmid (pIS1 containing the 3'-UTR region of interest) and 2ng of  
1020 firefly luciferase reporter control plasmid pIS0 per well. Luciferase readings were measured 24h  
1021 post-transfection with the Dual luciferase reporter assay system (Cat# E1910, Promega) using  
1022 the Synergy H1 plate reader. The *Renilla* reporter reading was normalized to its corresponding  
1023 firefly reading in every well to control for transfection efficiency.

1024

1025 **D4476 studies.**

1026 For dose-response measurements, MiaPaCa2 and Suit2 cells were seeded at a concentration  
1027 of 2500 cells per well in a 96-well white plate. The next day, D4476 was titrated over a range of  
1028 concentrations using the Tecan D300e Digital Dispenser and cell viability was measured 96h  
1029 post drug titration using a CellTiter-Glo assay. For cell proliferation experiments, MiaPaCa2 or  
1030 Suit2 cells were seeded at a concentration of 250 cells per well in a 96-well clear plate (Cat#  
1031 130188, Thermo Fisher Scientific). DMSO control or D4476 was dispensed at varying  
1032 concentrations and imaged on the Cytation™ 5 Cell Imaging Multi-Mode Reader to image cell  
1033 count (high contrast bright field) over time. For clonogenic experiments, MiaPaCa2 or Suit2 cells  
1034 were seeded at a concentration of 250 cells per well and treated with different concentrations of  
1035 D4476. The cells were allowed to grow over a period of 8-10 days after which they were fixed  
1036 (10% methanol, 10% acetic acid) and stained with 0.5% crystal violet solution (in methanol).  
1037 The plates were rinsed with PBS (137mM NaCl, 2.7mM KCl, 6.5mM Na<sub>2</sub>HPO<sub>4</sub>, 1.5mM  
1038 KH<sub>2</sub>PO<sub>4</sub>), dried overnight and scanned. The resulting images were quantified using ImageJ  
1039 (Version 1.50i). The images were uniformly thresholded and quantified for number of particles  
1040 (colonies).

1041

1042 **CSNK1A1 knockdown experiments.**

1043 Three different shRNAs against *CSNK1A1* gene as well as a non-targeting control shRNA (Con  
1044 shRNA) were used to generate MiaPaCa2 or Suit2 control and CK1 $\alpha$  knockdown cells.  
1045 Knockdown was confirmed via immunoblotting. Briefly, samples were run alongside a molecular  
1046 weight ladder (Cat# 26624, Thermo Fisher Scientific) on 10% SDS PAGE gels and then  
1047 transferred to PVDF membranes (Cat# IPVH00010, Thermo Fisher Scientific) at 100V for 1 h.  
1048 The membrane was blocked with 5% non-fat dry milk powder in PBST (PBS+ 0.1% Tween-20)  
1049 for 1h and then incubated in the same buffer containing the primary antibody overnight on a  
1050 shaker at 4°C. Polyclonal anti-CK1 $\alpha$  (1:1000) and monoclonal  $\beta$ -actin (1:1000) were used to  
1051 detect CK1 $\alpha$  and  $\beta$ -actin respectively. The membrane was washed 4 x 5 min in PBS-T, followed  
1052 by incubation with HRP-conjugated secondary antibodies (1:1000) for 1 h and then another 4 x  
1053 5 min washes. The blots were soaked with the ECL substrate (Cat# 32106, Thermo Fisher  
1054 Scientific) and imaged. For cell proliferation experiments, control and CK1 $\alpha$  knockdown Suit2  
1055 cell lines were seeded at a concentration of 250 cells per well in a 96-well white plate. Cell  
1056 proliferation was measured on Day 1, 3, 5 and 7 using a CellTiter-Glo assay. The same  
1057 procedure was repeated for MiaPaCa2 cells with a seed concentration of 500 cells per well. For  
1058 clonogenic assays, MiaPaCa2 or Suit2 cells were seeded at a concentration of 500 cells per  
1059 well in a 6-well clear plate. The cells were allowed to grow over a period of 8-10 days, fixed,  
1060 stained and quantified as described previously.

1061

1062 **Statistical analyses.**

1063 All findings presented were replicated in three or more independent experiments. Comparisons  
1064 between two groups were performed using unpaired *t-test* with Welch's correction in Graph Pad  
1065 Prism 8. In general,  $p < 0.05$  was considered significant, and the determined  $p$  values are  
1066 provided in the figure legends. Asterisks in graphs denote statistically significant differences as  
1067 described in figure legends.

1068

1069

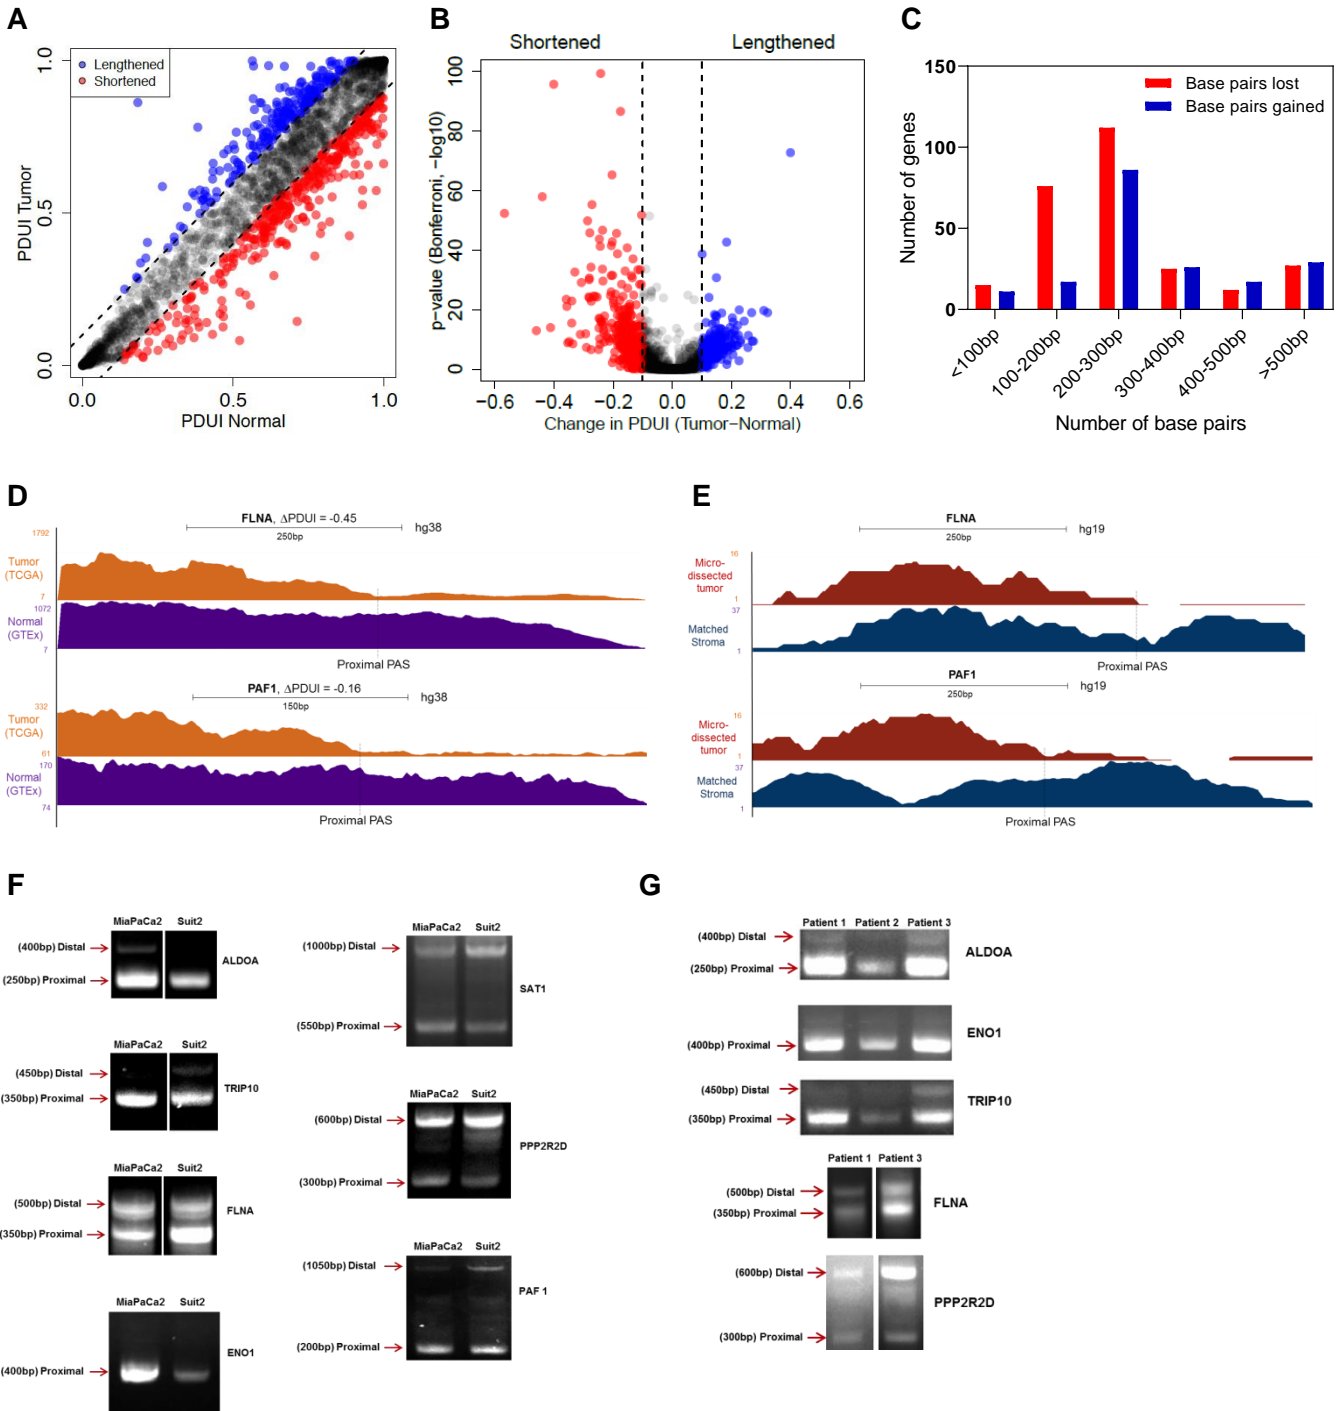

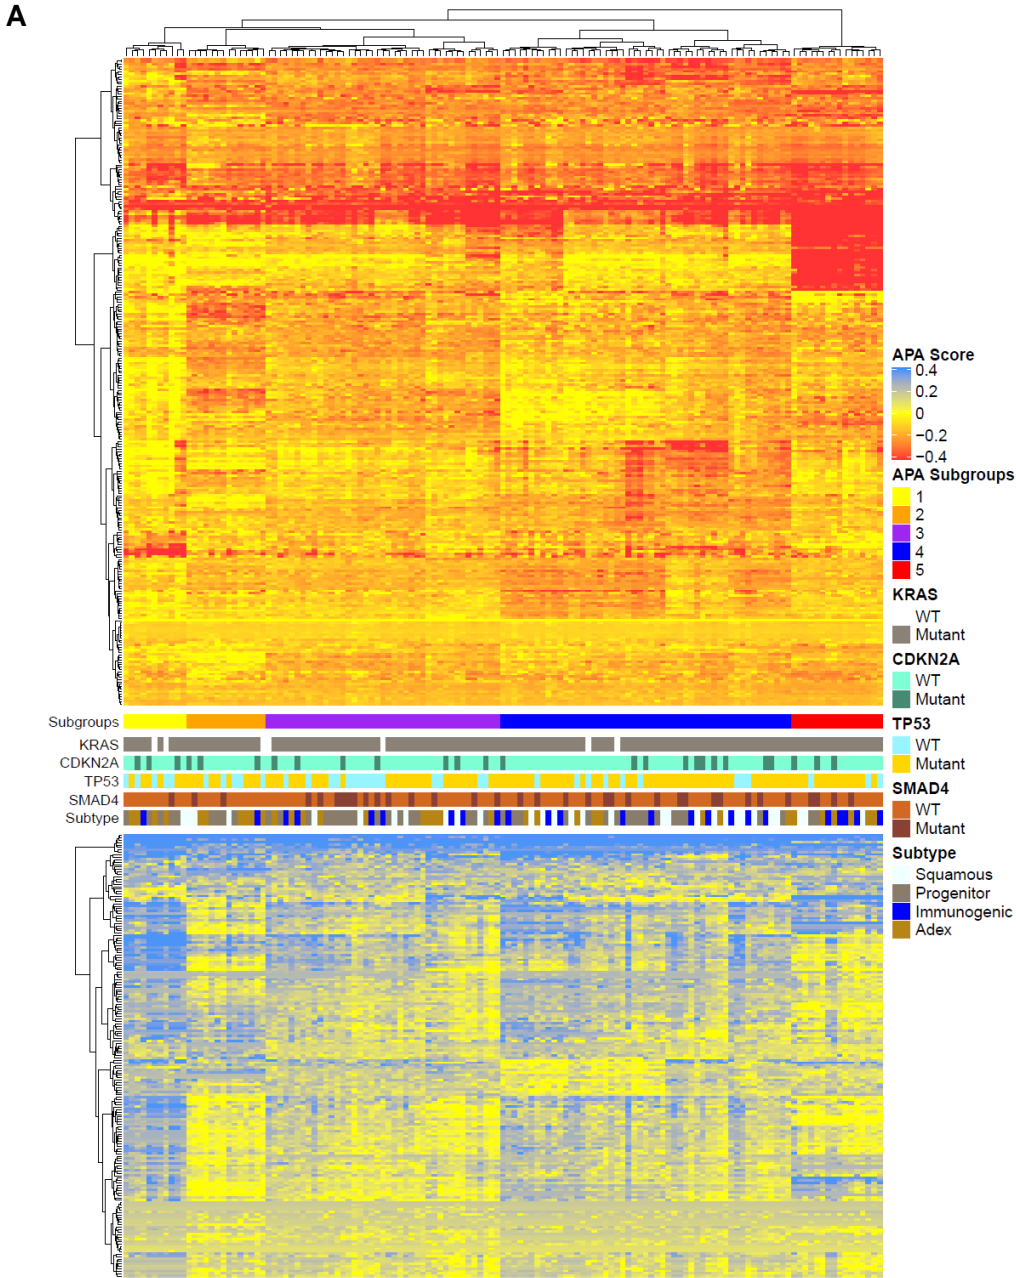

**B**

| Regulatory process                     | # Genes altered | FDR      | Representative genes           |
|----------------------------------------|-----------------|----------|--------------------------------|
| Metabolism of proteins                 | 107             | 2.62E-13 | EIF5A, HSPD1, MRPL32, ADD1     |
| Membrane Trafficking                   | 40              | 1.61E-06 | STX10, USO1, COPB1, M6PR       |
| mRNA Splicing                          | 17              | 3.89E-04 | HNRNPA1, SRSF11, PABPN1, SYMPK |
| mRNA 3'-end processing                 | 9               | 1.30E-03 | SRSF1, SRSF2, CHTOP, NCBP2     |
| Platelet activation and signaling      | 20              | 4.26E-04 | SERPINA1, FLNA, CFL1, ALDOA    |
| Smooth Muscle Contraction              | 6               | 1.13E-02 | CALM1, ANXA2, MYL6, TPM1       |
| Signaling by Receptor Tyrosine Kinases | 26              | 1.26E-03 | VAV2, BCAR1, RAP1B, CDC42      |
| Signaling by RHO GTPases               | 5               | 1.03E-02 | CALM1, MYL12B, CDC42, FLNA     |
| JAK-STAT signaling                     | 7               | 1.84E-02 | ANXA2, CDC42, RAP1B, PPIA      |
| Cell-extracellular matrix interactions | 4               | 3.87E-02 | VASP, ACTN1, FLNA, FBLIM1      |
| Cell cycle                             | 18              | 4.69E-02 | BUB3, PPP2R2D, SET, RAB2A      |



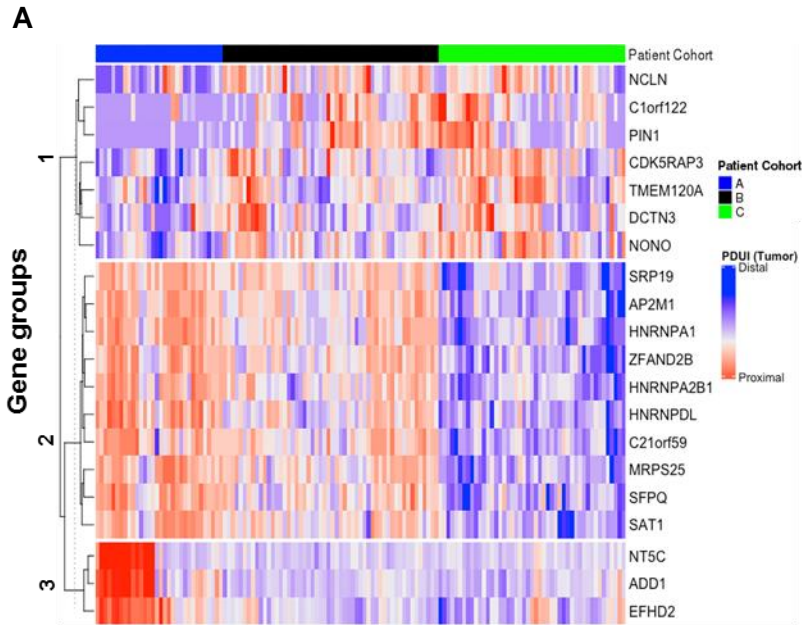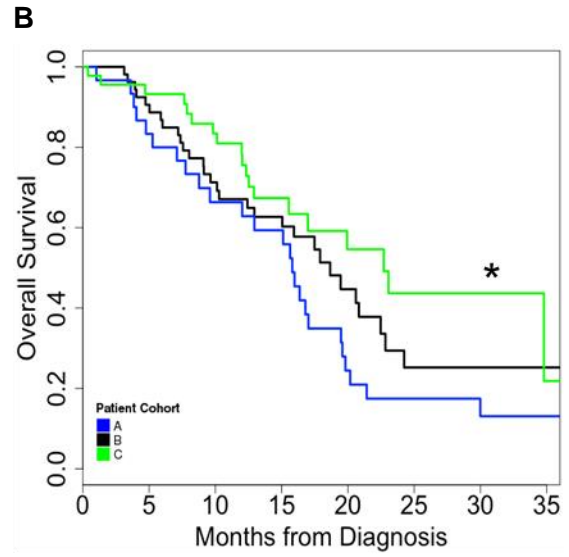

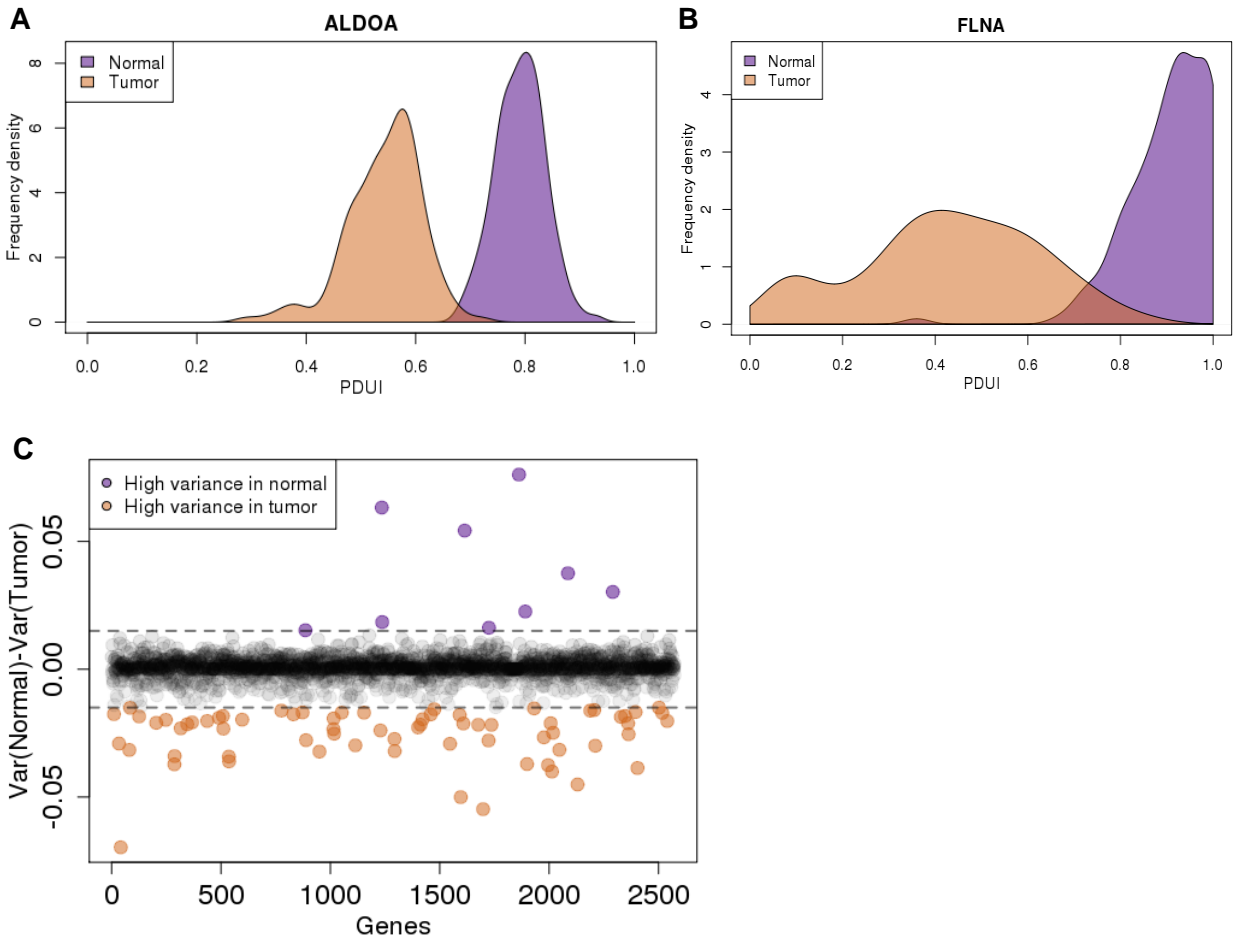

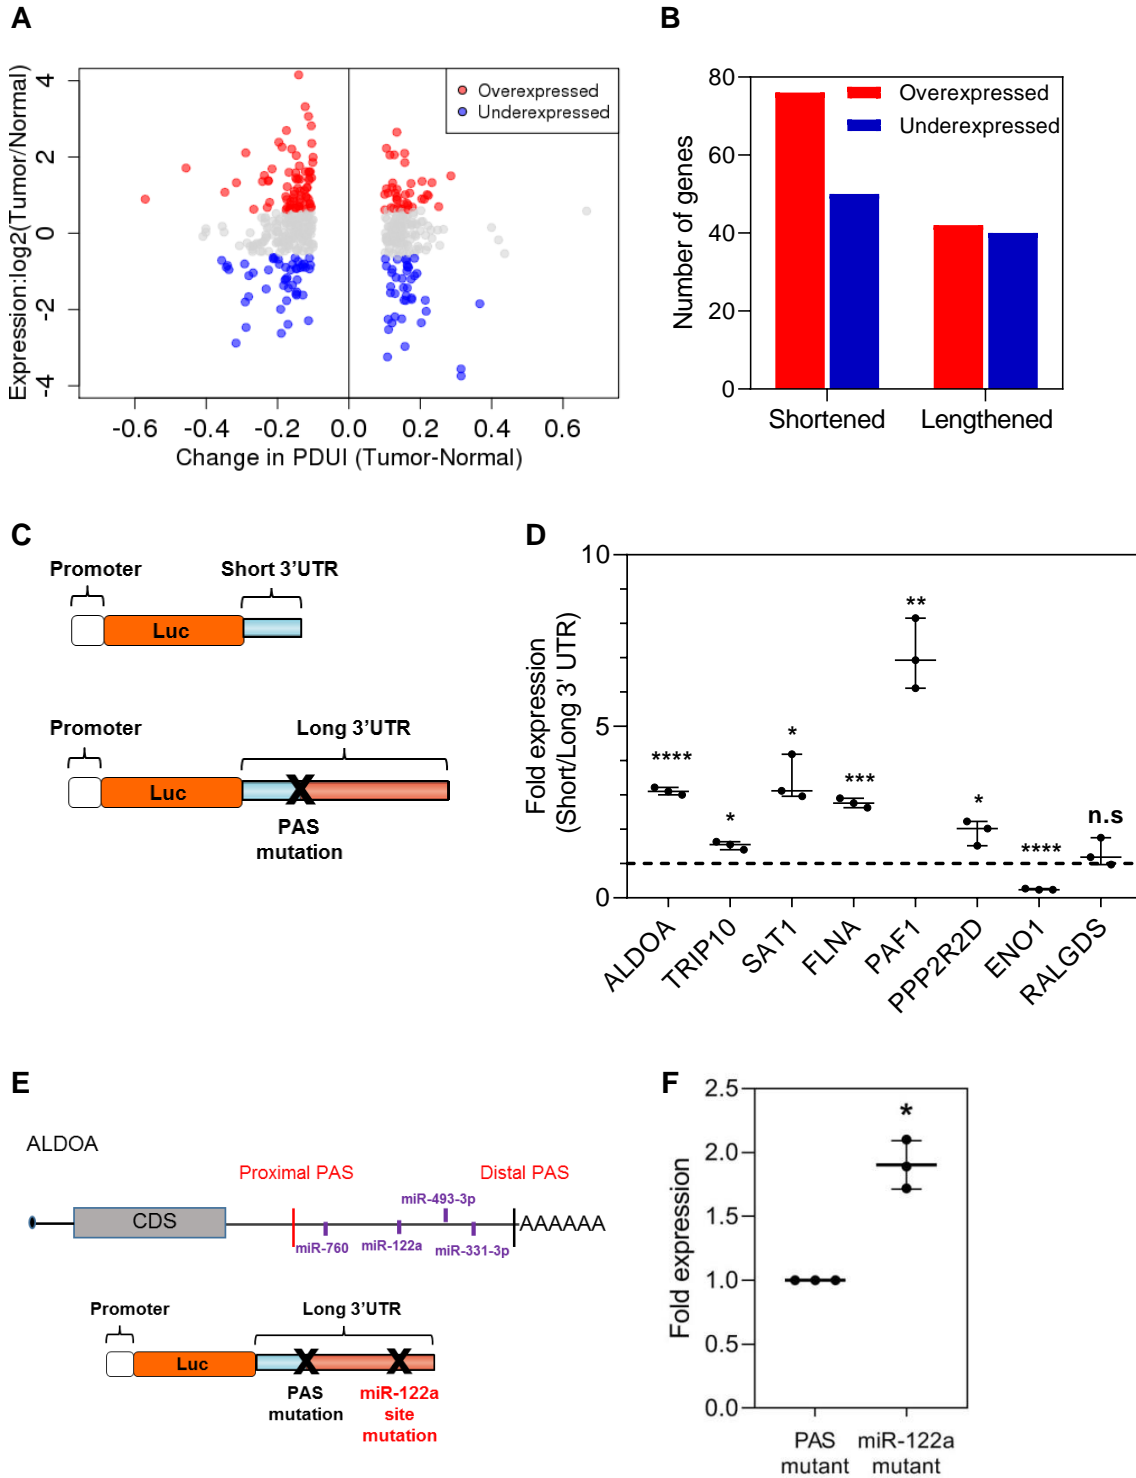

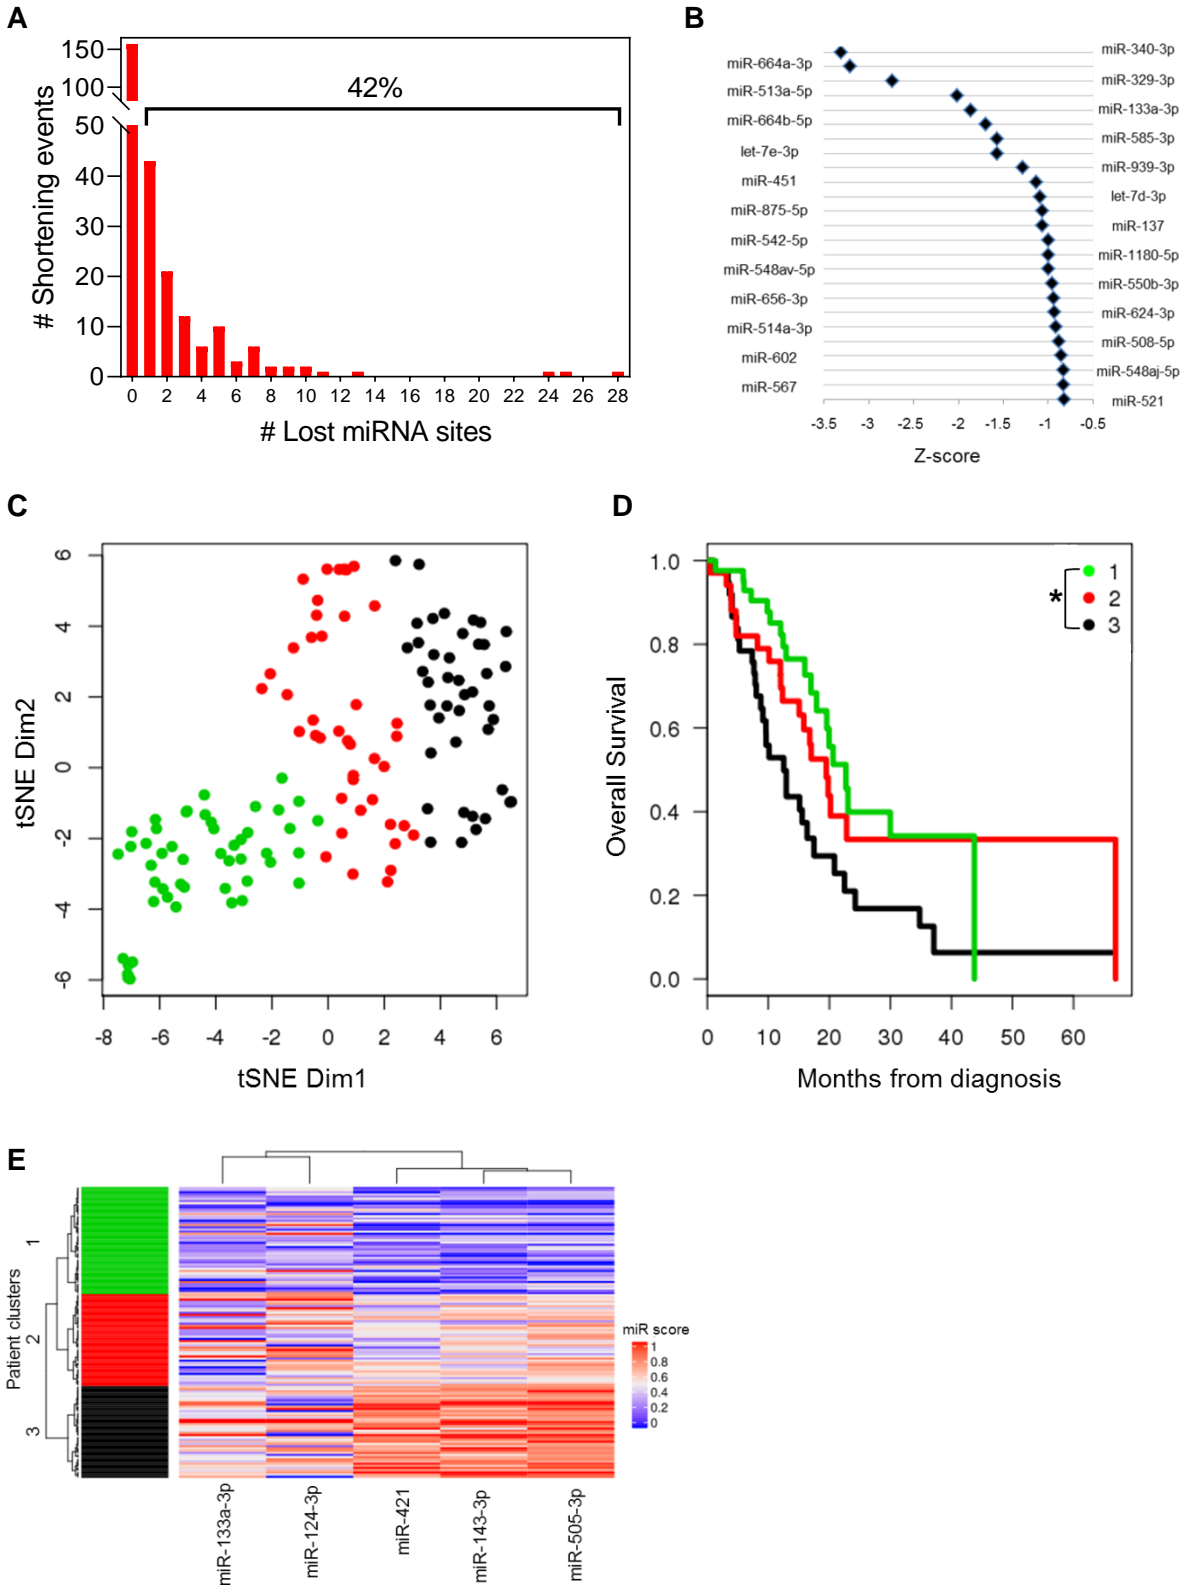

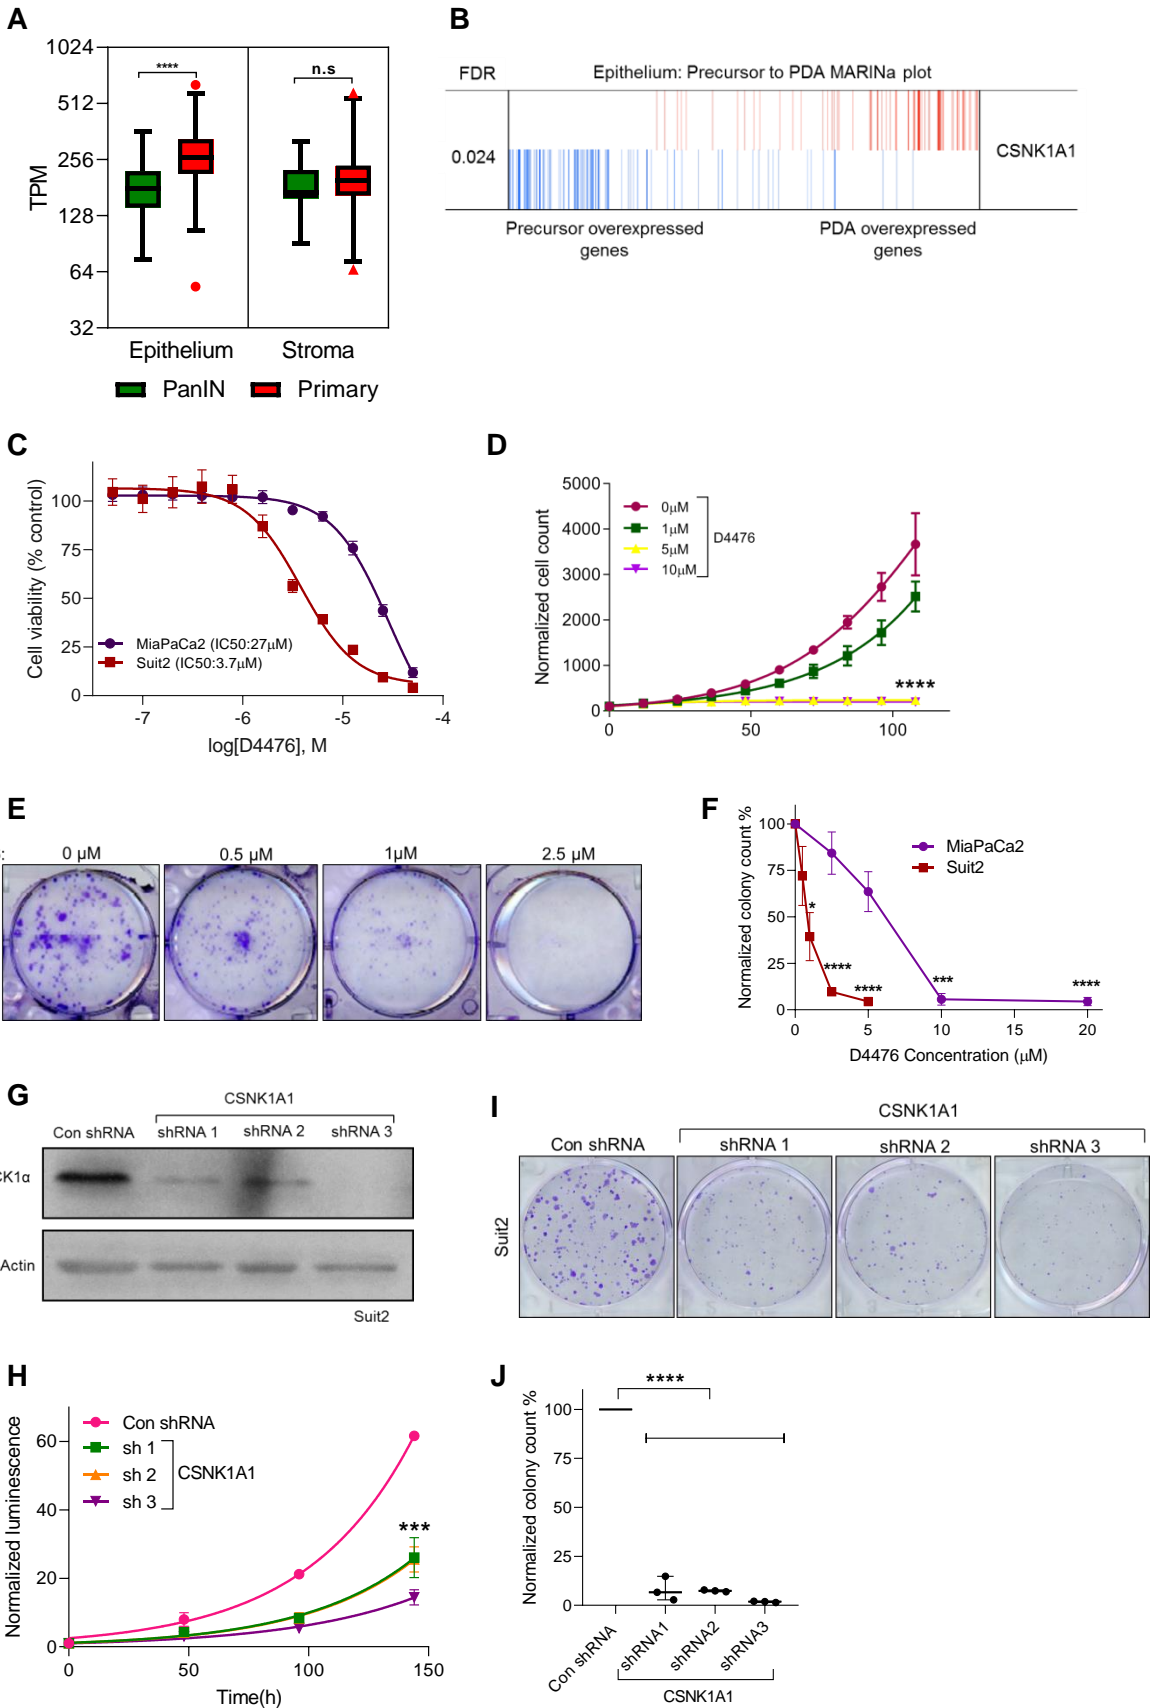

Source: https://www.biorxiv.org/content/10.1101/752295v1.full.pdf
